1 **Presynaptic depression maintains stable synaptic strength in developmentally arrested**

2 ***Drosophila* larvae.**

3

4 Sarah Perry<sup>1,#</sup>, Pragya Goel<sup>1,#</sup>, Daniel Miller<sup>2,3</sup>, Barry Ganetzky<sup>2</sup>, and Dion Dickman<sup>1,\*</sup>

5

6 <sup>1</sup>Department of Neurobiology, University of Southern California, Los Angeles, CA

7 <sup>2</sup>Laboratory of Genetics, University of Wisconsin, Madison, WI

8 <sup>3</sup>National Institute of Neurological Disease and Stroke, NIH, Bethesda, MD

9 #Equal contribution

10

11 Keywords: homeostasis; synapse; synaptic growth; neurotransmission; *Drosophila*;

12 neuromuscular junction; synaptic plasticity; neurodegeneration

13

14 Running title: Synaptic stability in arrested development

15

16 \*Correspondence and lead contact: dickman@usc.edu

17

18 Dion Dickman

19 University of Southern California

20 Department of Neurobiology

21 3641 Watt Way, HNB 309

22 Los Angeles, CA 90089-2520

23 Phone: (213) 740-7533

24

25

26

27 **ABSTRACT**

28 Positive and negative modes of regulation typically constrain synaptic growth and function within  
29 narrow physiological ranges. However, it is unclear how synaptic strength is maintained when  
30 both pre- and post-synaptic compartments continue to grow beyond stages imposed by typical  
31 developmental programs. To address whether and how synapses can adjust to a novel life  
32 stage for which they were never molded by evolution, we have characterized synaptic growth,  
33 structure and function at the *Drosophila* neuromuscular junction (NMJ) under conditions where  
34 larvae are terminally arrested at the third instar stage. While wild type larvae transition to pupae  
35 after 5 days, arrested third instar (ATI) larvae persist for up to 35 days, during which NMJs  
36 exhibit extensive overgrowth in muscle size, presynaptic release sites, and postsynaptic  
37 glutamate receptors. Remarkably, despite this exuberant growth of both pre- and post-synaptic  
38 structures, stable neurotransmission is maintained throughout the ATI lifespan through a potent  
39 homeostatic reduction in presynaptic neurotransmitter release. Arrest of the larval stage in  
40 *stathmin* mutants reveals a degree of progressive instability and neurodegeneration that was  
41 not apparent during the typical larval period. Hence, during a period of unconstrained synaptic  
42 growth through an extended developmental period, a robust and adaptive form of presynaptic  
43 homeostatic depression can stabilize neurotransmission. More generally, the ATI manipulation  
44 provides an attractive system for studying neurodegeneration and plasticity across longer time  
45 scales.

46

47

48

49

50

51

52

53 **SIGNIFICANCE STATEMENT**

54 It is unclear whether and how synapses adjust to a novel life stage for which they were never  
55 molded by evolution. We have characterized synaptic plasticity at the *Drosophila* neuromuscular  
56 junction in third instar larvae arrested in development for over 35 days. This approach has  
57 revealed that homeostatic depression stabilizes synaptic strength throughout the life of arrested  
58 third instars to compensate for excessive pre- and post-synaptic growth. This system also now  
59 opens the way for the study of synapses and degeneration over long time scales in this powerful  
60 model synapse.

61

62

63

64

65

66

67

68

69

70

71

72

73

74

75

76

77

78

79

## 80 INTRODUCTION

81 Synapses are confronted with extensive challenges during development, maturation, and aging  
82 yet maintain stable information exchange. The dynamic and massive changes in synapse  
83 growth, pruning and remodeling, coupled with intrinsic adjustments in neuronal excitability can  
84 lead to unstable physiological activity. The resulting imbalances in excitation and inhibition  
85 would propagate within neural circuits to undermine network stability. To adapt to such  
86 challenges, synapses are endowed with the capacity to homeostatically adjust  
87 neurotransmission while still permitting the flexibility necessary for Hebbian forms of plasticity  
88 (Pozo and Goda, 2010; Prudencio et al., 2015; Turrigiano, 2012, 2017). The homeostatic control  
89 of neural activity operates throughout organismal lifespan to balance the tension between  
90 stability and flexibility, and is thought to break down in neurological and psychiatric diseases  
91 (Eichler and Meier, 2008; Hunt et al., 2017; Nelson and Valakh, 2015; Styr and Slutsky, 2018;  
92 Wondolowski and Dickman, 2013). Although it is clear that synapses have the capacity to  
93 express both Hebbian and homeostatic forms of plasticity, how these processes are integrated  
94 and balanced, particularly during development and aging, remain enigmatic.

95       The *Drosophila* larval neuromuscular junction (NMJ) is an accessible and versatile  
96 model for studying synaptic function, plasticity, and disease. This model glutamatergic synapse  
97 has enabled fundamental insights into synaptic growth, transmission, homeostatic plasticity,  
98 injury (Frank, 2014; Keshishian et al.; Li et al., 2018b; Menon et al., 2013). However, studies in  
99 this system are limited by the relatively short larval period of 3-4 days before pupariation, when  
100 NMJ accessibility is lost. This short temporal window limits the use of the third instar larval NMJ  
101 as a model for interrogating dynamic processes over chronic time scales. However, recent  
102 studies on the signaling cascades in *Drosophila* that control the transition from third instar to the  
103 pupal stage have revealed attractive targets for extending the duration of the third instar  
104 (Gibbens et al., 2011; Rewitz et al., 2009; Walkiewicz and Stern, 2009).

105           Developmental progression in *Drosophila* larvae is coordinated through two semi-  
106 redundant signaling pathways via Torso and insulin-like receptors that ultimately lead to  
107 ecdysone synthesis and release from the prothoracic gland (PG) to drive the transition from the  
108 larval stage to pupation (Rewitz et al., 2009; Walkiewicz and Stern, 2009; Yamanaka et al.,  
109 2013). A previous study reduced signaling through one arm of this pathway to extend the third  
110 instar stage from 5 to 9 days, where the important observation that NMJs continue to grow and  
111 function throughout this period was made (Miller et al., 2012). More recent work has  
112 demonstrated that loss of key transcription factors in the PG, including Smox (dSMAD2), can  
113 disrupt both signaling pathways to fully arrest larval development and prevent the transition to  
114 pupal stages (Gibbens et al., 2011; Ohhara et al., 2017) Remarkably, these arrested third  
115 instars (ATI) remain in the larval stage until death. The development of ATI larvae now provides  
116 an opportunity to characterize synaptic growth, function, and plasticity in a system of terminally  
117 persistent expansion beyond normal physiological ranges and has the potential to reveal new  
118 insights into processes such as neurodegeneration.

119           Here, we have developed an optimized approach to arrest *Drosophila* larvae at third  
120 instar stages to characterize NMJ growth, function, and plasticity. We find that ATI larvae  
121 continue to grow and survive for up to 35 days, where NMJs exhibit exuberant expansion in  
122 both pre- and post-synaptic compartments. Interestingly, this growth should enhance synaptic  
123 strength, yet no significant change is observed compared to baseline values. Instead, a potent  
124 reduction in presynaptic neurotransmitter release maintains stable synaptic strength across the  
125 life of an ATI larva. Finally, the ATI larvae enabled new insights into the progression of  
126 neurodegeneration in *stathmin* mutants. Together, arresting larval development now provides a  
127 powerful foundation to probe the mechanisms of synaptic growth, function, homeostatic  
128 plasticity, and neurodegeneration at a model glutamatergic synapse in a genetically tractable  
129 system.

130

131 **RESULTS**

132 **Synaptic strength is maintained throughout the lifespan of an arrested third instar larva.**

133 To arrest larval development at the third instar stage, we targeted genes that could either  
134 disrupt both Torso and insulin signaling pathways or broadly inhibit the synthesis of ecdysone  
135 synthesis in the PG, processes ultimately necessary for the transition to pupal stages (Figure  
136 1A; (Gibbens et al., 2011; Ohhara et al., 2017)). We reasoned that if we could prevent the  
137 release of ecdysone from the PG by knocking down a key transcript(s), pupation would be  
138 delayed indefinitely (Yamanaka et al., 2013). We screened several lines described by other  
139 investigators and found that a particular RNAi line targeting *smox* (dSMAD2), a transcription  
140 factor required for expression of both *torso* and insulin receptor genes, was the most effective,  
141 reliably preventing pupation in nearly all animals (Figure 1A-B). These developmentally arrested  
142 third instars (ATI) persist as larvae and live up to 35 days after egg lay (AEL). Typical wild type  
143 larvae spend ~3 days in the third instar stage before pupation and metamorphosis, living  
144 beyond 60 days AEL as adults (Linford et al., 2013). For the first 5 days of development, ATI  
145 larvae appear largely unchanged compared to wild type, but they fail to progress to become  
146 “wandering” third instars. Rather, they continue to feed and gain body mass, peaking around 17  
147 days AEL (ATI.17) and then gradually losing body mass until dying soon after 33 days AEL  
148 (ATI.33) (Figure 1B). For further experiments, we compared wild type larvae at 5 days AEL  
149 (WT.5) to ATI larvae at varying time points, including 5 days AEL (ATI.5), a time point similar to  
150 wild type; 17 days AEL (ATI.17), a time corresponding to peak body mass; and 33 days AEL  
151 (ATI.33), a time near the terminal stage of the ATI lifespan.

152 To investigate NMJs across the ATI lifespan, we first characterized muscle size and  
153 passive electrical properties of the muscle. We observed a progressive gain in muscle size  
154 across the ATI lifespan, where muscle surface area increased by over 50%, peaking at ATI.17  
155 and then decreasing to ATI.33 (Figure 1C-D). Consistent with this substantial increase in  
156 muscle size, electrophysiological recordings of NMJs across the ATI lifespan revealed a

157 massive decrease in input resistance peaking around ATI.17 (Figure 1D). Remarkably, despite  
158 these changes in muscle size, synaptic strength (EPSP amplitude) remains constant across ATI  
159 NMJs (Figure 1E-F). Thus, as larvae grow and decline through an arrested third instar lifespan,  
160 synaptic strength at the NMJ remains constant.

161

### 162 **Presynaptic compartments at the NMJ progressively expand in ATI larvae.**

163 Clearly, ATI NMJs maintain synaptic strength despite the substantial increase in muscle size  
164 that progresses through arrested larval development. In principle, modulations to the number of  
165 presynaptic release sites ( $N$ ), the probability of release at each individual release site ( $P_r$ ),  
166 and/or the postsynaptic response to glutamate release from single synaptic vesicles (quantal  
167 size,  $Q$ ) could stabilize synaptic strength at these NMJs (Dittman and Ryan, 2019). We first  
168 assessed synaptic growth to determine whether the number of presynaptic release sites  
169 increases in proportion to the muscle surface area. During the conventional 3-4 day period of  
170 larval development, there is a 100-fold expansion in the NMJ, with changes to the passive  
171 electrical properties of the muscle and a concomitant growth of pre- and post-synaptic  
172 compartments (Atwood et al., 1993; Menon et al., 2013; Schuster et al., 1996). These changes  
173 are thought to scale NMJ function in parallel with growth and maintain sufficient depolarization  
174 for muscle contraction (Davis and Goodman, 1998). However, the progressive increase in  
175 muscle size at ATI NMJs poses a further challenge, where synapses may need to expand to  
176 compensate for overgrowth. We therefore considered whether adaptive changes in the growth  
177 of motor terminals and/or number of synapses served to stabilize synaptic strength (EPSP  
178 amplitude). Using immunostaining, we instead found a progressive enhancement in the  
179 neuronal membrane surface area and in the number of boutons per NMJ throughout the ATI  
180 lifespan (Figure 2A-D). In fact, the bouton to muscle area ratio even overshoots the scaling that  
181 is normally observed at conventional development between first and third instar larval stages

182 (WT.5: 40 boutons/40,000  $\mu\text{m}^2$  ratio (Schuster et al., 1996); ATI.17: 100 boutons/75,000  $\mu\text{m}^2$   
183 ratio (Table 1-1)). Hence, motor neuron terminals grow in excess to muscle growth.

184         Since NMJ boutons expand across ATI stages, we considered the possibility of a  
185 compensatory reduction in the number of release sites. There is precedence for a reduction in  
186 the density of active zones (AZs), independent of NMJ growth, to maintain synaptic strength  
187 (Graf et al., 2009). To identify individual presynaptic release sites, we immunostained NMJs with  
188 an antibody against Bruchpilot (BRP), a central scaffolding protein that constitutes the “T-bar”  
189 structure at AZs in *Drosophila* (Kittel et al., 2006; Wagh et al., 2006). Since ~96% of release  
190 sites are labeled by BRP at the fly NMJ (Akbergenova et al., 2018; Gratz et al., 2019; Wagh et  
191 al., 2006), we defined a release site as a BRP punctum and quantified these structures across  
192 the ATI lifespan. Interestingly, we found no significant changes in BRP puncta density across  
193 ATI stages, with total BRP puncta number per NMJ increasing in proportion to neuronal  
194 membrane area and bouton number (Figure 2A-D, Table 1-1). Finally, although the number of  
195 BRP puncta increased, the size and fluorescence intensity of these puncta can be reduced at  
196 NMJs to compensate for synaptic overgrowth, reducing Pr at individual release sites and  
197 maintaining overall synaptic strength (Goel et al., 2019a, 2019b). However, although BRP  
198 number at ATI NMJs increases to over three-fold that of wild-type NMJs, no compensatory  
199 reduction in size and/ or intensity of BRP puncta was observed (Figure 2A lower panel, Table 1-  
200 1). Indeed, BRP puncta intensity was significantly *increased* compared to WT.5 levels (Table 1-  
201 1), which may reflect the age-dependent increase size and intensity and active zones  
202 documented at the fly NMJ (Akbergenova et al., 2018). Thus, this anatomical analysis reveals  
203 an increase in the number of release sites (N) at ATI NMJs, implying that other adaptations  
204 compensate for excessive growth in ATI larvae.

205

206 **Postsynaptic receptor fields accumulate at the NMJ over the ATI lifespan.**



207 Given the substantial increase in AZ number and intensity but stable synaptic strength, we next  
208 considered the possibility that a reduction in the postsynaptic receptivity to neurotransmitter (Q)  
209 may have served to offset the observed presynaptic overgrowth at ATI NMJs. One possibility is  
210 that a reduction in the abundance, composition, and/or function of postsynaptic glutamate  
211 receptors (GluRs) may have occurred at ATI NMJs. At the fly NMJ, two receptor subtypes  
212 containing either GluRIIA- or GluRIIB- subunits form complexes with the essential GluRIIC,  
213 GluRIID, and GluRIIE subunits to mediate the postsynaptic currents driving neurotransmission  
214 (DiAntonio, 2006; Qin et al., 2005). GluRIIA-containing receptors mediate larger current  
215 amplitudes and slower decay kinetics compared to the GluRIIB-containing receptor counterparts  
216 (Han et al., 2015; Petersen et al., 1997). We examined the postsynaptic GluRs using antibodies  
217 that specifically recognize the GluRIIA- or GluRIIB- subunits, as well as the common GluRIID  
218 subunit. Consistent with presynaptic overgrowth, total GluR puncta numbers per NMJ mirrored  
219 the increase in presynaptic AZ number (Figure 3B). Similarly, we observed a significant  
220 increase in the abundance of all GluR subunits assessed at ATI NMJs revealed by enhanced  
221 fluorescence intensity (Figure 3C). Together, this demonstrates that postsynaptic receptor fields  
222 progressively expand in number and abundance, mirroring the accumulation in presynaptic  
223 structures across the ATI lifespan.

224 We next considered whether an apparent reduction in GluR functionality compensated  
225 for the expansion of glutamate receptor fields at ATI NMJs. We determined GluR functionality  
226 by electrophysiologically recording miniature events at ATI NMJs. Consistent with the increased  
227 fluorescence intensity of all subunits, we observed an ~50% increase in mEPSP amplitude  
228 compared to wild-type levels in ATI.17 larvae, an enhancement that persisted through ATI.33  
229 (Figure 3D-E). Consistent with increased presynaptic growth, we also observed an increase in  
230 mEPSP frequency (Figure 3F). Increased expression of GluRIIA-containing receptors at the fly  
231 NMJ enhances mEPSP amplitude, as expected, but does not alter presynaptic neurotransmitter  
232 release (Li et al., 2018c; Petersen et al., 1997). Thus, the increase in both AZ number (N) and

233 quantal size (Q) at ATI NMJs should have together elicited a larger evoked response. However,  
234 EPSP amplitude is unchanged throughout the ATI lifespan, implying that a reduction in release  
235 probability ( $P_r$ ) of sufficient magnitude must be induced to fully counteract the increase in N and  
236 Q to maintain stable synaptic strength at ATI NMJs.

237

238 **Synaptic strength at ATI NMJs is maintained through a potent homeostatic decrease in**  
239 **release probability.**

240 ATI larvae exhibit exuberant synaptic growth with accumulations of both pre- and post-synaptic  
241 components, resulting in an increased N and Q, factors that should enhance synaptic strength.  
242 However, EPSP amplitudes remain stable across the ATI lifespan, implying presynaptic release  
243 probability ( $P_r$ ) must be substantially and precisely diminished to compensate. To further test  
244 this idea, we calculated quantal content (the number of synaptic vesicles released per stimulus)  
245 and found a substantial reduction at ATI NMJs (Figure 4A). Next, we assessed presynaptic  
246 function independently of mEPSP amplitude by performing failure analysis, where repeated  
247 stimulations in low extracellular  $Ca^{2+}$  (0.15 mM) fail to elicit a response in ~50% of trials in wild  
248 type. At ATI NMJs, failure rate was markedly increased (Figure 4B), consistent with reduced  
249 quantal content. Finally, we assayed paired-pulse ratios to gauge  $P_r$ . At low extracellular  $Ca^{2+}$   
250 (0.3 mM), paired-pulse facilitation (PPF) is observed at wild-type NMJs, while paired-pulse  
251 depression (PPD) is found in elevated  $Ca^{2+}$  (1.5 mM)(Böhme et al., 2016; Li et al., 2018c). In  
252 ATI.17 and ATI.33 NMJs, PPF was significantly increased while PPD was reduced, consistent  
253 with reduced  $P_r$  relative to wild type (Figure 5C-D). It is interesting to note that a similar  
254 phenomenon has been observed at the *Drosophila* NMJ in the context of typical larval  
255 development, referred to as presynaptic homeostatic depression (PHD). Here, mEPSP size is  
256 enhanced while quantal content is reduced to maintain normal EPSP amplitudes (Daniels et al.,  
257 2004; Gaviño et al., 2015; Li et al., 2018c). While it is not clear that the mechanism of  
258 depression is shared between later ATI time points and PHD, we can posit that a homeostatic

259 reduction in presynaptic release probability compensates for increased quantal size to maintain  
260 synaptic strength across the ATI life span.

261 It has previously been shown that NMJs expressing PHD can also express other forms  
262 of homeostatic plasticity, including a process referred to as presynaptic homeostatic potentiation  
263 (PHP) (Gaviño et al., 2015; Goel et al., 2019a; Li et al., 2018c). To induce PHP, we applied the  
264 postsynaptic GluR antagonist philanthotoxin-343 (PhTx) (Frank et al., 2006). 10 min incubation  
265 in PhTx reduces mEPSP amplitude in both wild type and ATI NMJs, as expected (Figure 4-1). In  
266 turn, EPSP amplitude is maintained at baseline levels due to a retrograde, homeostatic increase  
267 in presynaptic neurotransmitter release in wild type. Similarly, PHP is robustly expressed across  
268 ATI NMJs (Figure 4-1). Thus, like PHD and other forms of homeostatic plasticity studied at the  
269 *Drosophila* NMJ, the presynaptic inhibition observed at ATI NMJs can be balanced with acute  
270 GluR challenge to express PHP and maintain stable synaptic strength.

271

### 272 **Extending the larval stage reveals the progression of axonal degeneration in *stathmin*** 273 **mutants.**

274 In our final set of experiments, we considered whether ATI larvae could be utilized as models for  
275 aging and/or neurodegeneration. We hypothesized that NMJs in ATI larvae were unlikely to  
276 exhibit classical hallmarks of aging synapses. Although muscle integrity appears to degrade in  
277 ATI.33 compared to earlier time points (Figure 1), synaptic growth (Figure 2), GluR receptor  
278 fields (Figure 3), and presynaptic function (Figure 4) all appear similar in ATI.33 relative to  
279 earlier time points. Indeed, while reductions in synaptic components and neurotransmission  
280 have been observed at aging mammalian NMJs (Li et al., 2018a; Taetzsch and Valdez, 2018),  
281 NMJ structure and function remains surprisingly robust in ATI larvae nearing death, with no  
282 apparent defects in synaptic function or even PHP plasticity. One additional canonical indicator  
283 of aging reported at mammalian NMJs includes presynaptic retractions and fragmentation (Li et  
284 al., 2018a; Taetzsch and Valdez, 2018). We therefore assessed synaptic retractions across the

285 ATI lifespan using an established “footprint” assay, in which a postsynaptic marker is observed  
286 to persist without a corresponding presynaptic marker (Eaton et al., 2005; Graf et al., 2011;  
287 Perry et al., 2017). However, ATI NMJs, including ATI.33, showed surprisingly stable synapses,  
288 with no apparent increases in footprints compared with earlier time points (Figure 5A-B).  
289 Together, these results indicate that NMJ structure, function, and integrity remain surprisingly  
290 robust across all stages of ATI larvae, even at terminal periods, and are therefore unlikely to  
291 serve as a compelling model for age-related synaptic decline.

292         Although NMJs remain structurally intact and stable across the lifespan of the ATI  
293 larvae, this manipulation does enable a substantially longer time scale compared to the typical 5  
294 days of larval development to investigate insults contribute to neuronal degeneration. We chose  
295 to characterize NMJ growth and stability in *stathmin* mutants extended through the ATI  
296 manipulation. Stathmin is a tubulin-associated factor involved in maintaining the integrity of the  
297 axonal cytoskeleton (Duncan et al., 2013; Graf et al., 2011; Lachkar et al., 2010; Ozon et al.,  
298 2002). The mammalian homolog of *Drosophila stathmin* (*SCG10*) is highly conserved and is  
299 thought to function as a surveillance factor for axon damage and degenerative signaling (Shin et  
300 al., 2014). In *Drosophila*, loss of *stathmin* leads to a marked increase in NMJ footprints, where  
301 more posterior segments show increased severity relative to more anterior segments (Graf et  
302 al., 2011). Surprisingly, *stathmin* mutants are still able to pupate and develop into adults.  
303 However, *stathmin* mutants extended in larval stages by the ATI manipulation die shortly after  
304 21 days AEL. We therefore sought to use the ATI system to determine the impact of a  
305 prolonged phase of axonal instability in *stathmin* mutants. Indeed, NMJs exhibit increased  
306 footprints in *stai.13* (*stathmin* mutants extended to ATI.13 time points) when compared to *stai.5*  
307 controls in both frequency (Figure 5C-D) and severity (Figure 5E), with the most severe  
308 retractions observed in posterior abdominal segments (A3-A5). Finally, we tested whether NMJ  
309 growth increased in ATI-extended *stathmin* NMJs, as it does in wild type. While control ATI  
310 synapses grow in bouton and BRP puncta number between 5 and 13 days AEL, *stathmin* NMJs

311 fail to consistently expand (Figure 5F-H). These experiments highlight the potential of the ATI  
312 system to be a useful tool for defining the progression of neurodegeneration at the *Drosophila*  
313 NMJ, which is otherwise limited to short larval stages.

314

## 315 **DISCUSSION**

316 By arresting further maturation at third instar *Drosophila* larvae, we have been able to  
317 accomplish a detailed study of NMJ structure, function, and plasticity over much longer  
318 timescales than previously possible. This ATI larval system has revealed how the NMJ  
319 maintains stable transmission over a vastly extended developmental timescale, where  
320 persistent overgrowth in both pre- and post-synaptic compartments is offset through a potent  
321 and homeostatic reduction in neurotransmitter release. Hence, this study not only provides  
322 evidence for a potentially novel homeostatic signaling system that balances release probability  
323 with synaptic overgrowth but now extends the temporal window to enable the characterization of  
324 a variety of processes, including neurodegeneration, at a powerful model synapse.

325       As described by Miller et al. (2012), NMJs in third instar larvae that have been  
326 developmentally arrested for at least a week beyond the normal time of pupariation continue to  
327 grow and add new boutons. Here we extend this observation to larvae arrested at the third  
328 instar for over 30 days, further demonstrating that mechanisms do not exist to suppress or  
329 negatively regulate growth when developmental timing is artificially extended. During normal  
330 larval growth from first to third instar, the body wall muscles undergo rapid and immense  
331 expansion, growing nearly 100-fold in surface area within a few days (Atwood et al., 1993;  
332 Menon et al., 2013). Presynaptic terminals grow and add new boutons in parallel with muscle  
333 growth, presumably to maintain stable NMJ strength. In effect, sufficient levels of muscle  
334 excitation is sustained through a coordinated increase in all three parameters controlling  
335 synaptic physiology: N (number of release sites), P (release probability at each site), and Q  
336 (quantal size) (Neher, 2015) Hence, during typical stages of larval development, increasing

337 muscle growth requires a concomitant elaboration in NMJs, implying robust signaling systems  
338 exist to ensure synaptic size, structure, and function expand in a coordinated manner. This tight  
339 structural coupling between muscle fiber and NMJ growth is also observed in mammals and is  
340 thought to be a primary mechanism for maintaining NMJ strength during post-developmental  
341 muscle growth or wasting (Balice-Gordon et al., 1990; Sanes and Lichtman, 1999, 2001).  
342 However, when the normal developmental program is made to continue without terminating in  
343 pupariation, NMJ growth continues apparently unchecked, posing a potential challenge of  
344 hyperexcitation. There is emerging evidence that when NMJ growth is genetically perturbed, a  
345 redistribution of active zone material or adaptations in synapse morphogenesis or postsynaptic  
346 neurotransmitter receptors can maintain stable synaptic strength (Bae et al., 2016; Goel et al.,  
347 2019a, 2019b; Graf et al., 2009). In the case of NMJ overgrowth in *endophilin* mutants, a  
348 homeostatic scaling in active zone size compensates for increased number to lower release  
349 probability and maintain stable synaptic strength (Goel et al., 2019a). However, NMJs in ATI  
350 larvae do not appear to utilize such strategies. Rather, a latent form of adaptive plasticity is  
351 revealed at ATI NMJs that is sufficiently potent and precise to inhibit neurotransmitter release  
352 probability and compensate for the overgrowth of both pre- and post-synaptic compartments.

353         The presynaptic inhibition of neurotransmitter release that maintains synaptic strength at  
354 ATI NMJs is a potentially novel phenomenon of homeostatic plasticity. This form of presynaptic  
355 depression appears to be an entirely functional change that reduces release probability, without  
356 any apparent adaptations to active zone number, intensity or synaptic structure.

357 Electrophysiologically, the presynaptic inhibition demonstrated at ATI NMJs resembles  
358 presynaptic homeostatic depression (PHD), a form of homeostatic plasticity characterized at the  
359 *Drosophila* NMJ in which excess glutamate release induces a compensatory reduction in  
360 release probability that maintains stable synaptic strength (Daniels et al., 2004; Gaviño et al.,  
361 2015; Li et al., 2018c). Like PHD, the presynaptic inhibition at ATI NMJs is not reflected in  
362 changes to the active zones or synaptic structure (Goel et al., 2019a; Gratz et al., 2019; Li et al.,

2018c). However, the only mechanisms known to be capable of inducing PHD require enhanced synaptic vesicle size that results from endocytosis mutants or overexpression of the vesicular glutamate transporter (Daniels et al., 2004; Dickman et al., 2005; Goel et al., 2019a; Verstreken et al., 2002; Winther et al., 2013). In contrast, there is no evidence for changes in synaptic vesicle size at ATI NMJs, as the enhanced postsynaptic glutamate receptor levels observed are sufficient to explain the increased quantal size (Fig. 3). Hence, if the homeostatic depression observed at ATI NMJs is ultimately the same plasticity mechanism as PHD, then this would be the first condition that does not require enlarged synaptic vesicle size. In this case, perhaps excess global glutamate release from increased release sites at ATI NMJs induces the same homeostatic plasticity that increased glutamate released from individual synaptic vesicles does. This would be consistent with a “glutamate homeostat”, responding to excess presynaptic glutamate release, necessary to induce and express PHD (Li et al., 2018c). Alternatively, the presynaptic inhibition triggered at ATI NMJs could be a novel form of presynaptic homeostatic depression which is induced in response to synaptic overgrowth. Interestingly, while increased postsynaptic glutamate receptors levels enhance mini size, no adaptive change in presynaptic function results, which leads to a concomitant increase in synaptic strength (DiAntonio et al., 1999; Li et al., 2018c). One possibility is that a coordinated increase in both pre- and post-synaptic compartments may be necessary to induce the presynaptic inhibition observed at ATI NMJs. The ATI model provides a unique opportunity to interrogate the interplay between developmental growth, adaptive presynaptic inhibition, and other homeostatic signaling systems.

Extending the larval stage through the ATI manipulation will circumvent limitations of the brief time window provided by the standard developmental program. Although the ATI model does not appear to exhibit the features described at aging mammalian NMJs (Li et al., 2018a; Taetzsch and Valdez, 2018), we have demonstrated its potential for modeling neurodegenerative conditions by showing the extent of synaptic destabilization caused by loss

389 of *stathmin* that was not fully apparent when restricted to the normal short developmental period  
390 in *Drosophila* larvae (Graf et al., 2011). In particular, by examining *stathmin* mutant phenotypes  
391 in ATI-extended larvae, we were able to observe progressive, time-dependent retractions of  
392 presynaptic terminals and gain further insight into *stathmin*'s role in normal NMJ growth and  
393 stability. Consistent with the role of *stathmin* in flies, the mammalian homolog (*SCG10*) is  
394 thought to be part of an axonal injury surveillance system, where it accumulates after injury and  
395 is involved in regenerative signaling (Shin et al., 2014). More generally, previous studies of  
396 degenerative disease models in the larval system have been limited by the brief timespan. For  
397 example, one important ALS disease model in flies involves overexpression of repetitive RNAs  
398 and peptides derived from the human *C9ORF72* gene (Mizielinska et al., 2014; Xu et al., 2013).  
399 However, while a variety of progressive and degenerative phenotypes are observed in  
400 photoreceptors of adult flies, only the most toxic transgenes are capable of inducing substantial  
401 neurodegeneration at the larval NMJ (Perry et al., 2017), likely due to the limited time frame of  
402 typical larval development. The longer timescale enabled by the ATI model therefore provides  
403 new opportunities to study progressive phenotypes during neuronal injury, stress, and  
404 neurodegeneration in addition to the plasticity discussed above in a rapid and genetically  
405 tractable system. Indeed, fly models of neurodegenerative conditions such as ALS,  
406 Huntington's, Parkinson's and Alzheimer's diseases (McGurk et al., 2015) can benefit from the  
407 high resolution imaging and electrophysiological approaches established at the larval NMJ. The  
408 powerful combination of established genetic tools, including binary expression systems  
409 (Gal4/UAS, LexA, QF systems; (Venken et al., 2011)) and emerging CRISPR/Cas9  
410 manipulations (Bier et al., 2018) with the ATI model provides an exciting foundation to gain new  
411 insights into synaptic growth, structure, function, plasticity, injury, and neurodegeneration over  
412 long times using the glutamatergic NMJ as a model.

413

## 414 **MATERIALS AND METHODS**



415 **Fly Stocks:** *Drosophila* stocks were raised at 25°C on standard molasses food. The *w<sup>1118</sup>* strain  
416 is used as the wild type control unless otherwise noted, as this is the genetic background of the  
417 genetic mutants used in this study. ATI larvae were generated by crossing *phm-GAL4* (Miller et  
418 al., 2012) to *UAS-smox-RNAi* (BDSC #41670). *Stathmin* mutations were introduced into the ATI  
419 background (*stai* allele: BDSC #16165). All experiments were performed on male or female  
420 third-instar larvae or arrested third instar larvae at various time points. A complete list of all  
421 stocks and reagents used in this study, see Table 2-1.

422

423 **Immunocytochemistry:** Third-instar male or female larvae were dissected in ice cold 0 Ca<sup>2+</sup>  
424 HL-3 and fixed in Bouin's fixative for 5 min as described (Chen et al., 2017). Briefly, larvae were  
425 washed with PBS containing 0.1% Triton X-100 (PBST) for 30 min, blocked for an hour with 5%  
426 normal donkey serum in PBST, and incubated overnight in primary antibodies at 4°C followed  
427 by washes and incubation in secondary antibodies. Samples were mounted in VectaShield  
428 (Vector Laboratories). The following antibodies were used: mouse anti-Bruchpilot (nc82; 1:100;  
429 Developmental Studies Hybridoma Bank; DSHB); rabbit anti-DLG ((1:10,000; (Pielage et al.,  
430 2005)); guinea pig anti-vGlut ((1:2000; (Goel and Dickman, 2018)); mouse anti-GluRIIA (8B4D2;  
431 1:100; DSHB); affinity purified rabbit anti-GluRIIB (1:1000; (Perry et al., 2017)), guinea pig anti-  
432 GluRIID ((1:1000; (Perry et al., 2017)). Donkey anti-mouse, anti-guinea pig, and anti-rabbit  
433 Alexa Fluor 488-, Cyanine 3 (Cy3)-, and Dy Light 405- conjugated secondary antibodies  
434 (Jackson ImmunoResearch) were used at 1:400. Alexa Fluor 647 conjugated goat anti-HRP  
435 (Jackson ImmunoResearch) was used at 1:200. All antibody information is summarized in Table  
436 2-1.

437

438 **Confocal imaging and analysis:** Samples were imaged using a Nikon A1R Resonant  
439 Scanning Confocal microscope equipped with NIS Elements software and a 100x APO 1.4NA  
440 oil immersion objective using separate channels with four laser lines (405, 488, 561, and 637

441 nm). For fluorescence quantifications of BRP intensity levels, z-stacks were obtained using  
442 identical settings for all genotypes with z-axis spacing 0.5  $\mu\text{m}$  within an experiment and  
443 optimized for detection without saturation of the signal as described (Perry et al., 2017).  
444 Boutons were counted using vGlut- and HRP-stained Ib NMJ terminals on muscle 4 of segment  
445 A2-A4, considering each vGlut punctum to be a bouton. The general analysis toolkit in the NIS  
446 Elements software was used for image analysis as described (Kikuma et al., 2017). Neuronal  
447 surface area was calculated by creating a mask around the HRP channel that labels the  
448 neuronal membrane. BRP puncta number, area, and total BRP intensity per NMJ were  
449 quantified by applying by using a bright-spot detection method and filters to binary layers on the  
450 BRP labeled 488 channel in a manner similar to that previously described (Goel et al., 2019b).  
451 GluRIIA, GluRIIB, and GluRIID puncta intensities were quantified by measuring the total sum  
452 intensity of each individual GluR punctum and these values were then averaged per NMJ to get  
453 one sample measurement (n). For NMJ retraction analysis, footprints were scored by eye as  
454 reported in (Eaton et al., 2005) on M6/7 segments A2-A5. Anti-DLG was used as a postsynaptic  
455 marker and either anti-vGlut or anti-BRP for a presynaptic marker (wild type controls yielded  
456 similar retraction scores for either presynaptic marker).

457

458 **Electrophysiology:** All dissections and recordings were performed in modified HL-3 saline  
459 (Stewart et al., 1994; Dickman et al., 2005; Kiragasi et al., 2017) containing (in mM): 70 NaCl, 5  
460 KCl, 10  $\text{MgCl}_2$ , 10  $\text{NaHCO}_3$ , 115 Sucrose, 5 Trehelose, 5 HEPES, and 0.4  $\text{CaCl}_2$ , pH 7.2.  
461 Neuromuscular junction sharp electrode (electrode resistance between 10-30  $\text{M}\Omega$ ) recordings  
462 were performed on muscles 6 and 7 of abdominal segments A2 and A3 in wandering third-instar  
463 larvae as described (Goel et al., 2019a). Recordings were performed on an Olympus BX61 WI  
464 microscope using a 40x/0.80 water-dipping objective, and acquired using an Axoclamp 900A  
465 amplifier, Digidata 1440A acquisition system and pClamp 10.5 software (Molecular Devices).

466 Electrophysiological sweeps were digitized at 10 kHz and filtered at 1 kHz. Data were analyzed  
467 using Clampfit (Molecular devices), MiniAnalysis (Synaptosoft), and Excel (Microsoft) software.

468 Miniature excitatory postsynaptic potentials (mEPSPs) were recorded in the absence of  
469 any stimulation and cut motor axons were stimulated to elicit excitatory postsynaptic potentials  
470 (EPSPs). Average mEPSP, EPSP, and quantal content were calculated for each genotype by  
471 dividing EPSP amplitude by mEPSP amplitude. Muscle input resistance ( $R_{in}$ ) and resting  
472 membrane potential ( $V_{rest}$ ) were monitored during each experiment. Recordings were rejected if  
473 the  $V_{rest}$  was above -60 mV, if the  $R_{in}$  was less than 5 M $\Omega$ , or if either measurement deviated by  
474 more than 10% during the course of the experiment. Larvae were incubated with or without  
475 philanthotoxin-433 (PhTx; Sigma; 20  $\mu$ M) resuspended in HL-3 for 10 mins, as described (Frank  
476 et al., 2006; Dickman and Davis, 2009).

477 Failure analysis was performed in HL-3 solution containing 0.15 mM CaCl<sub>2</sub>, which  
478 resulted in failures in about half of the stimulated responses in wild-type larvae. A total of 40  
479 trials (stimulations) were performed at each NMJ in all genotypes. Failure rate was obtained by  
480 dividing the total number of failures by the total number of trials (40). Paired-pulse recordings  
481 were performed at a Ca<sup>2+</sup> concentration of 0.3 mM to assay facilitation (PPF) and 1.5 mM for  
482 depression (PPD). Following the first AP stimulation, a second EPSC was evoked at an  
483 interstimulus interval of 16.67 ms (60 Hz). Paired-pulse ratios were calculated as the EPSC  
484 amplitude of the second response divided by the first response (EPSC2/EPSC1).

485

486 **Experimental Design and Statistical Analysis:** For electrophysiological and immunostaining  
487 experiments, each NMJ terminal (muscle 6 for physiology, and muscle 4 for immunostaining  
488 analyses) is considered an n of 1 since each presynaptic motor neuron terminal is confined to  
489 its own muscle hemi-segment. For these experiments, muscles 4 or 6 were analyzed from hemi-  
490 segments A2-A4 from each larvae, typically 2 NMJs/animal per experiment. To control for

491 variability between larvae within a genotype, NMJs were analyzed from at least 5 individual  
492 larvae. See Table 1-1 for additional details.

493 Statistical analysis was performed using GraphPad Prism (version 7.0) or Microsoft  
494 Excel software (version 16.22). Data were assessed for normality using a D'Agostino-Pearson  
495 omnibus normality test, which determined that the assumption of normality of the sample  
496 distribution was not violated. Normally distributed data were analyzed for statistical significance  
497 using a Student's t-test (pairwise comparison) or an analysis of variance (ANOVA) and Tukey's  
498 test for multiple comparisons. Data were then compared using either a one-way ANOVA and  
499 tested for significance using a Tukey's multiple comparison test or using an unpaired 2-tailed  
500 Student's t-test with Welch's correction. All data are presented as mean +/-SEM. with varying  
501 levels of significance assessed as  $p < 0.05$  (\*),  $p < 0.01$  (\*\*),  $p < 0.001$  (\*\*\*),  $p < 0.0001$  (\*\*\*\*), ns=not  
502 significant. See Table 1-1 for additional statistical details and values.

503

#### 504 **AUTHOR CONTRIBUTIONS**

505 The authors declare no competing interests. S.P., P.G., and D.D. conceived and designed the  
506 study. All experiments were performed by S.P. and P.G. D.M. and B.G. communicated key  
507 observations related to *smox-RNAi* and *stathmin* in the ATI background based on their own  
508 unpublished studies. The manuscript was written by S.P., P.G., and D.D. with feedback from  
509 D.M. and B.G.

510

#### 511 **ACKNOWLEDGEMENTS**

512 We thank Naoki Yamanaka (UC Riverside, CA, USA) and Mike O'Connor (U of Minnesota, MN,  
513 USA) who sent us other RNAi lines to test for the ATI model. We also thank the Bloomington  
514 *Drosophila* Stock Center and Developmental Studies Hybridoma Bank for additional stocks and  
515 reagents (National Institutes of Health grant P40OD018537). This study was supported by a  
516 grant from the National Institute of Neurological Disease and Stroke to D.D. (NS111414).

517

## 518 REFERENCES

- 519 Akbergenova, Y., Cunningham, K.L., Zhang, Y. V, Weiss, S., and Littleton, J.T. (2018).  
520 Characterization of developmental and molecular factors underlying release heterogeneity at  
521 *Drosophila* synapses. *Elife* 7 e38268.  
522
- 523 Atwood, H.L., Govind, C.K., and Wu, C.-F. (1993). Differential ultrastructure of synaptic  
524 terminals on ventral longitudinal abdominal muscles in *Drosophila* larvae. *J. Neurobiol.* 24,  
525 1008–1024.  
526
- 527 Bae, H., Chen, S., Roche, J.P., Ai, M., Wu, C., Diantonio, A., and Graf, E.R. (2016). Rab3-GEF  
528 Controls Active Zone Development at the *Drosophila* Neuromuscular Junction. *Eneuro* 3,  
529 ENEURO.0031-16.2016.  
530
- 531 Balice-Gordon, R.J., Breedlove, S.M., Bernstein, S., and Lichtman, J.W. (1990). Neuromuscular  
532 junctions shrink and expand as muscle fiber size is manipulated: in vivo observations in the  
533 androgen-sensitive bulbocavernosus muscle of mice. *J. Neurosci.* 10, 2660–2671.  
534
- 535 Bier, E., Harrison, M.M., O'Connor-Giles, K.M., and Wildonger, J. (2018). Advances in  
536 Engineering the Fly Genome with the CRISPR-Cas System. *Genetics* 208, 1–18.  
537
- 538 Böhme, M.A., Beis, C., Reddy-Alla, S., Reynolds, E., Mampell, M.M., Grasskamp, A.T.,  
539 Lützkendorf, J., Bergeron, D.D., Driller, J.H., Babikir, H., et al. (2016). Active zone scaffolds  
540 differentially accumulate Unc13 isoforms to tune Ca(2+) channel-vesicle coupling. *Nat.*  
541 *Neurosci.* 19, 1311–1320.  
542
- 543 Daniels, R.W., Collins, C.A., Gelfand, M. V, Dant, J., Brooks, E.S., Krantz, D.E., and DiAntonio,  
544 A. (2004). Increased Expression of the *Drosophila* Vesicular Glutamate Transporter Leads to  
545 Excess Glutamate Release and a Compensatory Decrease in Quantal Content. *J. Neurosci.* 24,  
546 10466–10474.  
547
- 548 Davis, G.W., and Goodman, C.S. (1998). Genetic analysis of synaptic development and  
549 plasticity: homeostatic regulation of synaptic efficacy. *Curr. Opin. Neurobiol.* 8, 149–156.  
550
- 551 DiAntonio, A. (2006). Glutamate Receptors At The *Drosophila* Neuromuscular Junction. *Int.*  
552 *Rev. Neurobiol.* 75, 165–179.  
553
- 554 DiAntonio, A., Petersen, S.A., Heckmann, M., and Goodman, C.S. (1999). Glutamate Receptor  
555 Expression Regulates Quantal Size and Quantal Content at the *Drosophila* Neuromuscular  
556 Junction. *J. Neurosci.* 19, 3023–3032.  
557
- 558 Dickman, D.K., Horne, J.A., Meinertzhagen, I.A., and Schwarz, T.L. (2005). A Slowed Classical  
559 Pathway Rather Than Kiss-and-Run Mediates Endocytosis at Synapses Lacking Synaptotagmin  
560 and Endophilin. *Cell* 123, 521–533.  
561
- 562 Dittman, J.S., and Ryan, T.A. (2019). The control of release probability at nerve terminals. *Nat.*  
563 *Rev. Neurosci.* 20, 177–186.  
564
- 565 Duncan, J.E., Lytle, N.K., Zuniga, A., and Goldstein, L.S.B. (2013). The Microtubule Regulatory

- 566 Protein Stathmin Is Required to Maintain the Integrity of Axonal Microtubules in *Drosophila*.  
567 *PLoS One* 8, e68324.  
568
- 569 Eaton, B.A., Davis, G.W., Haerry, T.E., Wu, A.Y., Martin, J., O'Connor, M.B., Lee, C.H., Lee, T.,  
570 Wang, J.Y., Falls, D.L., et al. (2005). LIM Kinase1 controls synaptic stability downstream of the  
571 type II BMP receptor. *Neuron* 47, 695–708.  
572
- 573 Eichler, S.A., and Meier, J.C. (2008). E-I balance and human diseases – from molecules to  
574 networking. *Front. Mol. Neurosci.* 1, 2.  
575
- 576 Frank, C.A. (2014). Homeostatic plasticity at the *Drosophila* neuromuscular junction.  
577 *Neuropharmacology* 78, 63–74.  
578
- 579 Frank, C.A., Kennedy, M.J., Goold, C.P., Marek, K.W., and Davis, G.W. (2006). Mechanisms  
580 underlying the rapid induction and sustained expression of synaptic homeostasis. *Neuron* 52,  
581 663–677.  
582
- 583 Gaviño, M.A., Ford, K.J., Archila, S., and Davis, G.W. (2015). Homeostatic synaptic depression  
584 is achieved through a regulated decrease in presynaptic calcium channel abundance. *Elife* 4,  
585 e05473.  
586
- 587 Gibbens, Y.Y., Warren, J.T., Gilbert, L.I., O'Connor, M.B., Cho, S.H., Smith, M.M., Padgett,  
588 R.W., and O'Connor, M.B. (2011). Neuroendocrine regulation of *Drosophila* metamorphosis  
589 requires TGFbeta/Activin signaling. *Development* 138, 2693–2703.  
590
- 591 Goel, P., Dufour Bergeron, D., Böhme, M.A., Nunnally, L., Lehmann, M., Buser, C., Walter,  
592 A.M., Sigrist, S.J., and Dickman, D. (2019a). Homeostatic scaling of active zone scaffolds  
593 maintains global synaptic strength. *J. Cell Biol.* 218, 1706–1724.  
594
- 595 Goel, P., Khan, M., Howard, S., Kim, G., Kiragasi, B., Kikuma, K., and Dickman, D. (2019b). A  
596 Screen for Synaptic Growth Mutants Reveals Mechanisms That Stabilize Synaptic Strength. *J.*  
597 *Neurosci.* 39, 4051–4065.  
598
- 599 Graf, E.R., Daniels, R.W., Burgess, R.W., Schwarz, T.L., and DiAntonio, A. (2009). Rab3  
600 Dynamically Controls Protein Composition at Active Zones. *Neuron* 64, 663–677.  
601
- 602 Graf, E.R., Heerssen, H.M., Wright, C.M., Davis, G.W., and DiAntonio, A. (2011). Stathmin is  
603 Required for Stability of the *Drosophila* Neuromuscular Junction. *J. Neurosci.* 31, 15026–15034.  
604
- 605 Gratz, S.J., Goel, P., Bruckner, J.J., Hernandez, R.X., Khateeb, K., Macleod, G.T., Dickman, D.,  
606 and O'Connor-Giles, K.M. (2019). Endogenous Tagging Reveals Differential Regulation of Ca<sup>2+</sup>  
607 Channels at Single Active Zones during Presynaptic Homeostatic Potentiation and Depression.  
608 *J. Neurosci.* 39, 2416–2429.  
609
- 610 Han, T.H., Dharkar, P., Mayer, M.L., and Serpe, M. (2015). Functional reconstitution of  
611 *Drosophila melanogaster* NMJ glutamate receptors. *Proc. Natl. Acad. Sci.* 112, 6182–6187.  
612
- 613 Hunt, M.J., Kopell, N.J., Traub, R.D., and Whittington, M.A. (2017). Aberrant Network Activity in  
614 Schizophrenia. *Trends Neurosci.* 40, 371–382.  
615
- 616 Keshishian, H., Broadie, K., Chiba, A., and Bate, M. (1996). The *Drosophila* Neuromuscular

- 617 Junction: A Model System for Studying Synaptic Development and Function. *Annu. Rev.*  
618 *Neurosci.* 19, 545–575.
- 619
- 620 Kittel, R.J., Wichmann, C., Rasse, T.M., Fouquet, W., Schmidt, M., Schmid, A., Wagh, D.A.,  
621 Pawlu, C., Kellner, R.R., Willig, K.I., et al. (2006). Bruchpilot promotes active zone assembly,  
622 Ca<sup>2+</sup> channel clustering, and vesicle release. *Science* 312, 1051–1054.
- 623
- 624 Lachkar, S., Lebois, M., Steinmetz, M.O., Guichet, A., Lal, N., Curmi, P.A., Sobel, A., and Ozon,  
625 S. (2010). Drosophila stathmins bind tubulin heterodimers with high and variable  
626 stoichiometries. *J. Biol. Chem.* 285, 11667–11680.
- 627
- 628 Li, L., Xiong, W.-C., and Mei, L. (2018a). Neuromuscular Junction Formation, Aging, and  
629 Disorders. *Annu. Rev. Physiol.* 80, 159–188.
- 630
- 631 Li, X., Goel, P., Wondolowski, J., Paluch, J., and Dickman, D. (2018b). A Glutamate Homeostat  
632 Controls the Presynaptic Inhibition of Neurotransmitter Release. *Cell Rep.* 23, 1716–1727.
- 633
- 634 Li, X., Goel, P., Chen, C., Angajala, V., Chen, X., and Dickman, D.K. (2018b). Synapse-specific  
635 and compartmentalized expression of presynaptic homeostatic potentiation. *Elife* 7, e34338.
- 636
- 637 Linford, N.J., Bilgir, C., Ro, J., and Pletcher, S.D. (2013). Measurement of lifespan in *Drosophila*  
638 *melanogaster*. *J. Vis. Exp.*
- 639
- 640 McGurk, L., Berson, A., and Bonini, N.M. (2015). *Drosophila* as an In Vivo Model for Human  
641 Neurodegenerative Disease. *Genetics* 201, 377–402.
- 642
- 643 Menon, K.P., Carrillo, R.A., and Zinn, K. (2013). Development and plasticity of the *Drosophila*  
644 larval neuromuscular junction. *Wiley Interdiscip. Rev. Dev. Biol.* 2, 647–670.
- 645
- 646 Miller, D.L., Ballard, S.L., and Ganetzky, B. (2012). Analysis of synaptic growth and function in  
647 *Drosophila* with an extended larval stage. *J. Neurosci.* 32, 13776–13786.
- 648
- 649 Mizielińska, S., Grönke, S., Niccoli, T., Ridler, C.E., Clayton, E.L., Devoy, A., Moens, T.,  
650 Norona, F.E., Woollacott, I.O.C., Pietrzyk, J., et al. (2014). C9orf72 repeat expansions cause  
651 neurodegeneration in *Drosophila* through arginine-rich proteins. *Science* (80-. ). 345.
- 652
- 653 Neher, E. (2015). Merits and Limitations of Vesicle Pool Models in View of Heterogeneous  
654 Populations of Synaptic Vesicles. *Neuron* 87, 1131–1142.
- 655
- 656 Nelson, S.B., and Valakh, V. (2015). Excitatory/Inhibitory Balance and Circuit Homeostasis in  
657 Autism Spectrum Disorders. *Neuron* 87, 684–698.
- 658
- 659 Ohhara, Y., Kobayashi, S., and Yamanaka, N. (2017). Nutrient-Dependent Endocycling in  
660 Steroidogenic Tissue Dictates Timing of Metamorphosis in *Drosophila melanogaster*. *PLOS*  
661 *Genet.* 13, e1006583.
- 662
- 663 Ozon, S., Guichet, A., Gavet, O., Roth, S., and Sobel, A. (2002). *Drosophila* stathmin: a  
664 microtubule-destabilizing factor involved in nervous system formation. *Mol. Biol. Cell* 13, 698–  
665 710.
- 666
- 667 Perry, S., Han, Y., Das, A., and Dickman, D. (2017). Homeostatic plasticity can be induced and

668 expressed to restore synaptic strength at neuromuscular junctions undergoing ALS-related  
669 degeneration. *Hum. Mol. Genet.* 26(21):4153-4167.  
670  
671 Petersen, S.A., Fetter, R.D., Noordermeer, J.N., Goodman, C.S., and DiAntonio, A. (1997).  
672 Genetic Analysis of Glutamate Receptors in *Drosophila* Reveals a Retrograde Signal Regulating  
673 Presynaptic Transmitter Release. *Neuron* 19, 1237–1248.  
674  
675 Pozo, K., and Goda, Y. (2010). Unraveling Mechanisms of Homeostatic Synaptic Plasticity.  
676 *Neuron* 66, 337–351.  
677  
678 Prudencio, M., Belzil, V. V, Batra, R., Ross, C.A., Gendron, T.F., Pregent, L.J., Murray, M.E.,  
679 Overstreet, K.K., Piazza-Johnston, A.E., Desaro, P., et al. (2015). Distinct brain transcriptome  
680 profiles in C9orf72-associated and sporadic ALS. *Nat. Neurosci.* 18, 1175–1182.  
681  
682 Qin, G., Schwarz, T., Kittel, R.J., Schmid, A., Rasse, T.M., Kappei, D., Ponimaskin, E.,  
683 Heckmann, M., and Sigrist, S.J. (2005). Four Different Subunits Are Essential for Expressing the  
684 Synaptic Glutamate Receptor at Neuromuscular Junctions of *Drosophila*. *J. Neurosci.* 25, 3209–  
685 3218.  
686  
687 Rewitz, K.F., Yamanaka, N., Gilbert, L.I., and O'Connor, M.B. (2009). The insect neuropeptide  
688 PTH activates receptor tyrosine kinase torso to initiate metamorphosis. *Science* 326, 1403–  
689 1405.  
690  
691 Sanes, J.R., and Lichtman, J.W. (1999). DEVELOPMENT OF THE VERTEBRATE  
692 NEUROMUSCULAR JUNCTION. *Annu. Rev. Neurosci.* 22, 389–442.  
693  
694 Sanes, J.R., and Lichtman, J.W. (2001). Induction, assembly, maturation and maintenance of a  
695 postsynaptic apparatus. *Nat. Rev. Neurosci.* 2, 791–805.  
696  
697 Schuster, C.M., Davis, G.W., Fetter, R.D., and Goodman, C.S. (1996). Genetic dissection of  
698 structural and functional components of synaptic plasticity. I. Fasciclin II controls synaptic  
699 stabilization and growth. *Neuron* 17, 641–654.  
700  
701 Shin, J.E., Geisler, S., and DiAntonio, A. (2014). Dynamic regulation of SCG10 in regenerating  
702 axons after injury. *Exp. Neurol.* 252, 1–11.  
703  
704 Styr, B., and Slutsky, I. (2018). Imbalance between firing homeostasis and synaptic plasticity  
705 drives early-phase Alzheimer's disease. *Nat. Neurosci.* 21, 463–473.  
706  
707 Taetzsch, T., and Valdez, G. (2018). NMJ maintenance and repair in aging. *Curr. Opin. Physiol.*  
708 4, 57–64.  
709  
710 Turrigiano, G. (2012). Homeostatic Synaptic Plasticity: Local and Global Mechanisms for  
711 Stabilizing Neuronal Function. *Cold Spring Harb. Perspect. Biol.* 4, a005736–a005736.  
712  
713 Turrigiano, G.G. (2017). The dialectic of Hebb and homeostasis. *Philos. Trans. R. Soc. B Biol.*  
714 *Sci.* 372, 20160258.  
715  
716 Venken, K.J.T., Simpson, J.H., and Bellen, H.J. (2011). Genetic manipulation of genes and cells  
717 in the nervous system of the fruit fly. *Neuron* 72, 202–230.  
718



- 719 Verstreken, P., Kjaerulff, O., Lloyd, T.E., Atkinson, R., Zhou, Y., Meinertzhagen, I.A., and  
720 Bellen, H.J. (2002). Endophilin mutations block clathrin-mediated endocytosis but not  
721 neurotransmitter release. *Cell* 109, 101–112.  
722
- 723 Wagh, D.A., Rasse, T.M., Asan, E., Hofbauer, A., Schwenkert, I., Dürrbeck, H., Buchner, S.,  
724 Dabauvalle, M.-C., Schmidt, M., Qin, G., et al. (2006). Bruchpilot, a protein with homology to  
725 ELKS/CAST, is required for structural integrity and function of synaptic active zones in  
726 *Drosophila*. *Neuron* 49, 833–844.  
727
- 728 Walkiewicz, M.A., and Stern, M. (2009). Increased Insulin/Insulin Growth Factor Signaling  
729 Advances the Onset of Metamorphosis in *Drosophila*. *PLoS One* 4, e5072.  
730
- 731 Winther, Å.M.E., Jiao, W., Vorontsova, O., Rees, K.A., Koh, T.-W., Sopova, E., Schulze, K.L.,  
732 Bellen, H.J., and Shupliakov, O. (2013). The dynamin-binding domains of Dap160/intersectin  
733 affect bulk membrane retrieval in synapses. *J. Cell Sci.* 126, 1021–1031.  
734
- 735 Wondolowski, J., and Dickman, D. (2013). Emerging links between homeostatic synaptic  
736 plasticity and neurological disease. *Front. Cell. Neurosci.* 7, 223.  
737
- 738 Xu, Z., Poidevin, M., Li, X., Li, Y., Shu, L., Nelson, D.L., Li, H., Hales, C.M., Gearing, M., Wingo,  
739 T.S., et al. (2013). Expanded GGGGCC repeat RNA associated with amyotrophic lateral  
740 sclerosis and frontotemporal dementia causes neurodegeneration. *Proc. Natl. Acad. Sci. U. S.*  
741 *A.* 110, 7778–7783.  
742
- 743 Yamanaka, N., Rewitz, K.F., and O'Connor, M.B. (2013). Ecdysone control of developmental  
744 transitions: lessons from *Drosophila* research. *Annu. Rev. Entomol.* 58, 497–516.  
745

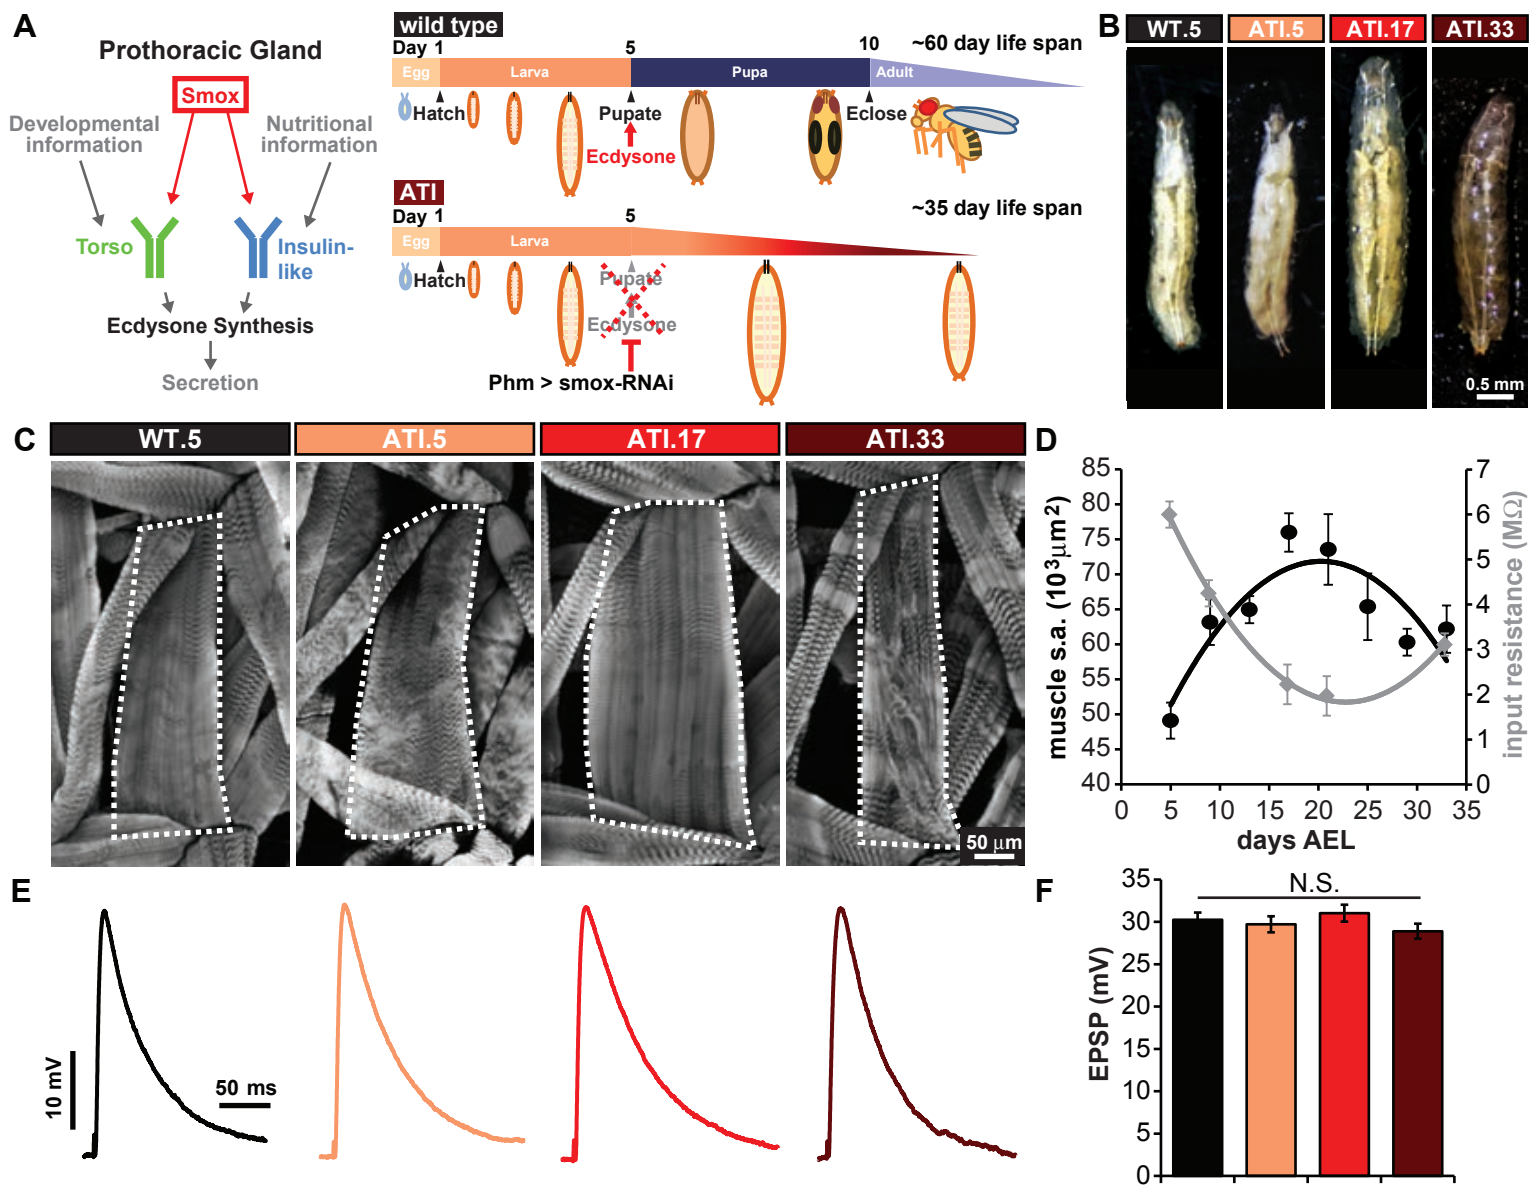

**Figure 1: Synaptic strength remains stable throughout the life of an arrested third instar larvae.** **(A)** (Left) Schematic illustrating the signaling pathway that stimulates ecdysone synthesis in the prothoracic gland prior to pupal formation. The transcription factor Smox is required for the expression of both Torso and insulin receptors. (Right) Schematic illustration comparing wild type fly development and *smox-RNAi* arrested development. **(B)** Representative photographs of third instar wild type larva (WT.5) and *smox-RNAi* (ATI) larva at different time points (days after egg lay (AEL)). **(C)** Representative images of larval body walls stained with anti-phalloidin to highlight muscle structure. M4 surface area is outlined in each image. **(D)** Graph summarizing muscle surface area measurements (black) and muscle compartment input resistance (grey) across ATI lifespan. **(E)** Representative EPSP traces for WT.5, ATI.5, 17 and 33 NMJs. **(F)** Average EPSP amplitudes for the genotypes shown in (E). Error bars indicate  $\pm$ SEM. Additional details and statistical information (mean values, SEM, n, p, statistical tests data shown in F) are shown in Table 1-1.

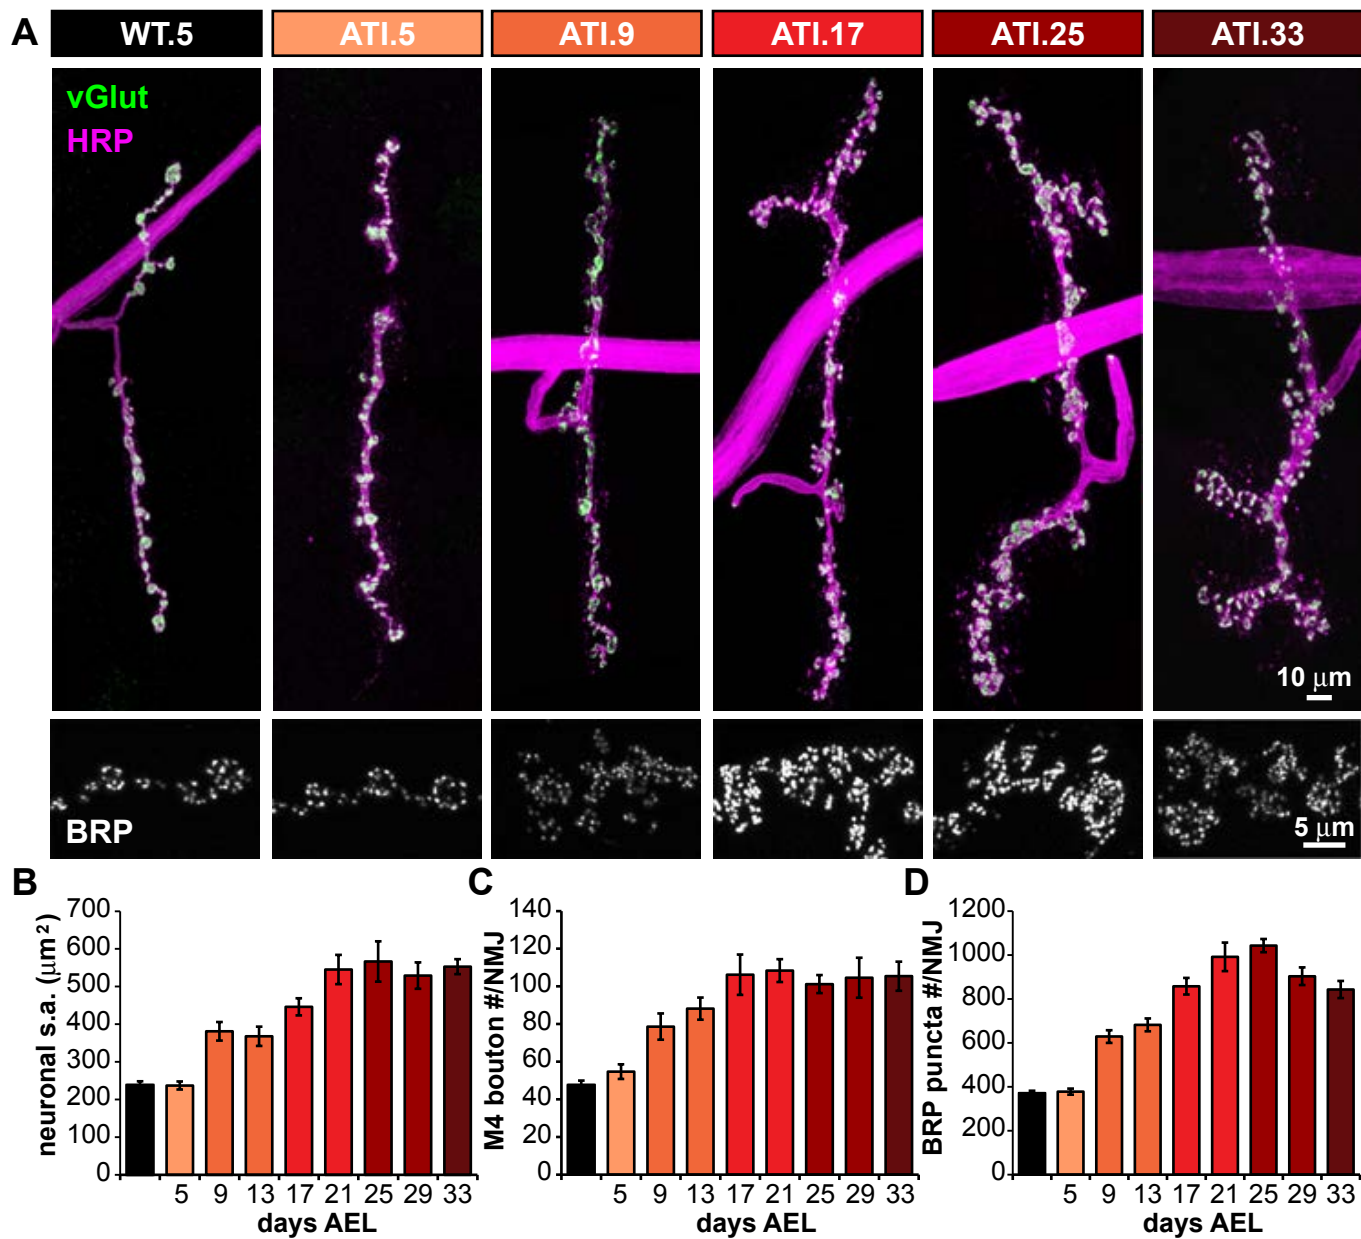

**Figure 2: Progressive synaptic growth and a concomitant accumulation of release sites at ATI NMJs. (A)** (Top) Representative M4-Ib images of NMJs for WT.5 and several ATI time points stained with anti-vGlut (vesicle-filled boutons, green) and anti-HRP (neuronal membrane, magenta). (Bottom) representative portion of the synapses above marked with anti-BRP (active zone scaffold). **(B-D)** Graphs showing the average neuronal membrane surface area (B), bouton number (C), and BRP puncta number (D) per muscle 4 NMJ for WT.5 and the indicated ATI time points. Error bars indicate  $\pm$ SEM. Statistical information (mean values, SEM, n, p and additional BRP data) are shown in Table 1-1.

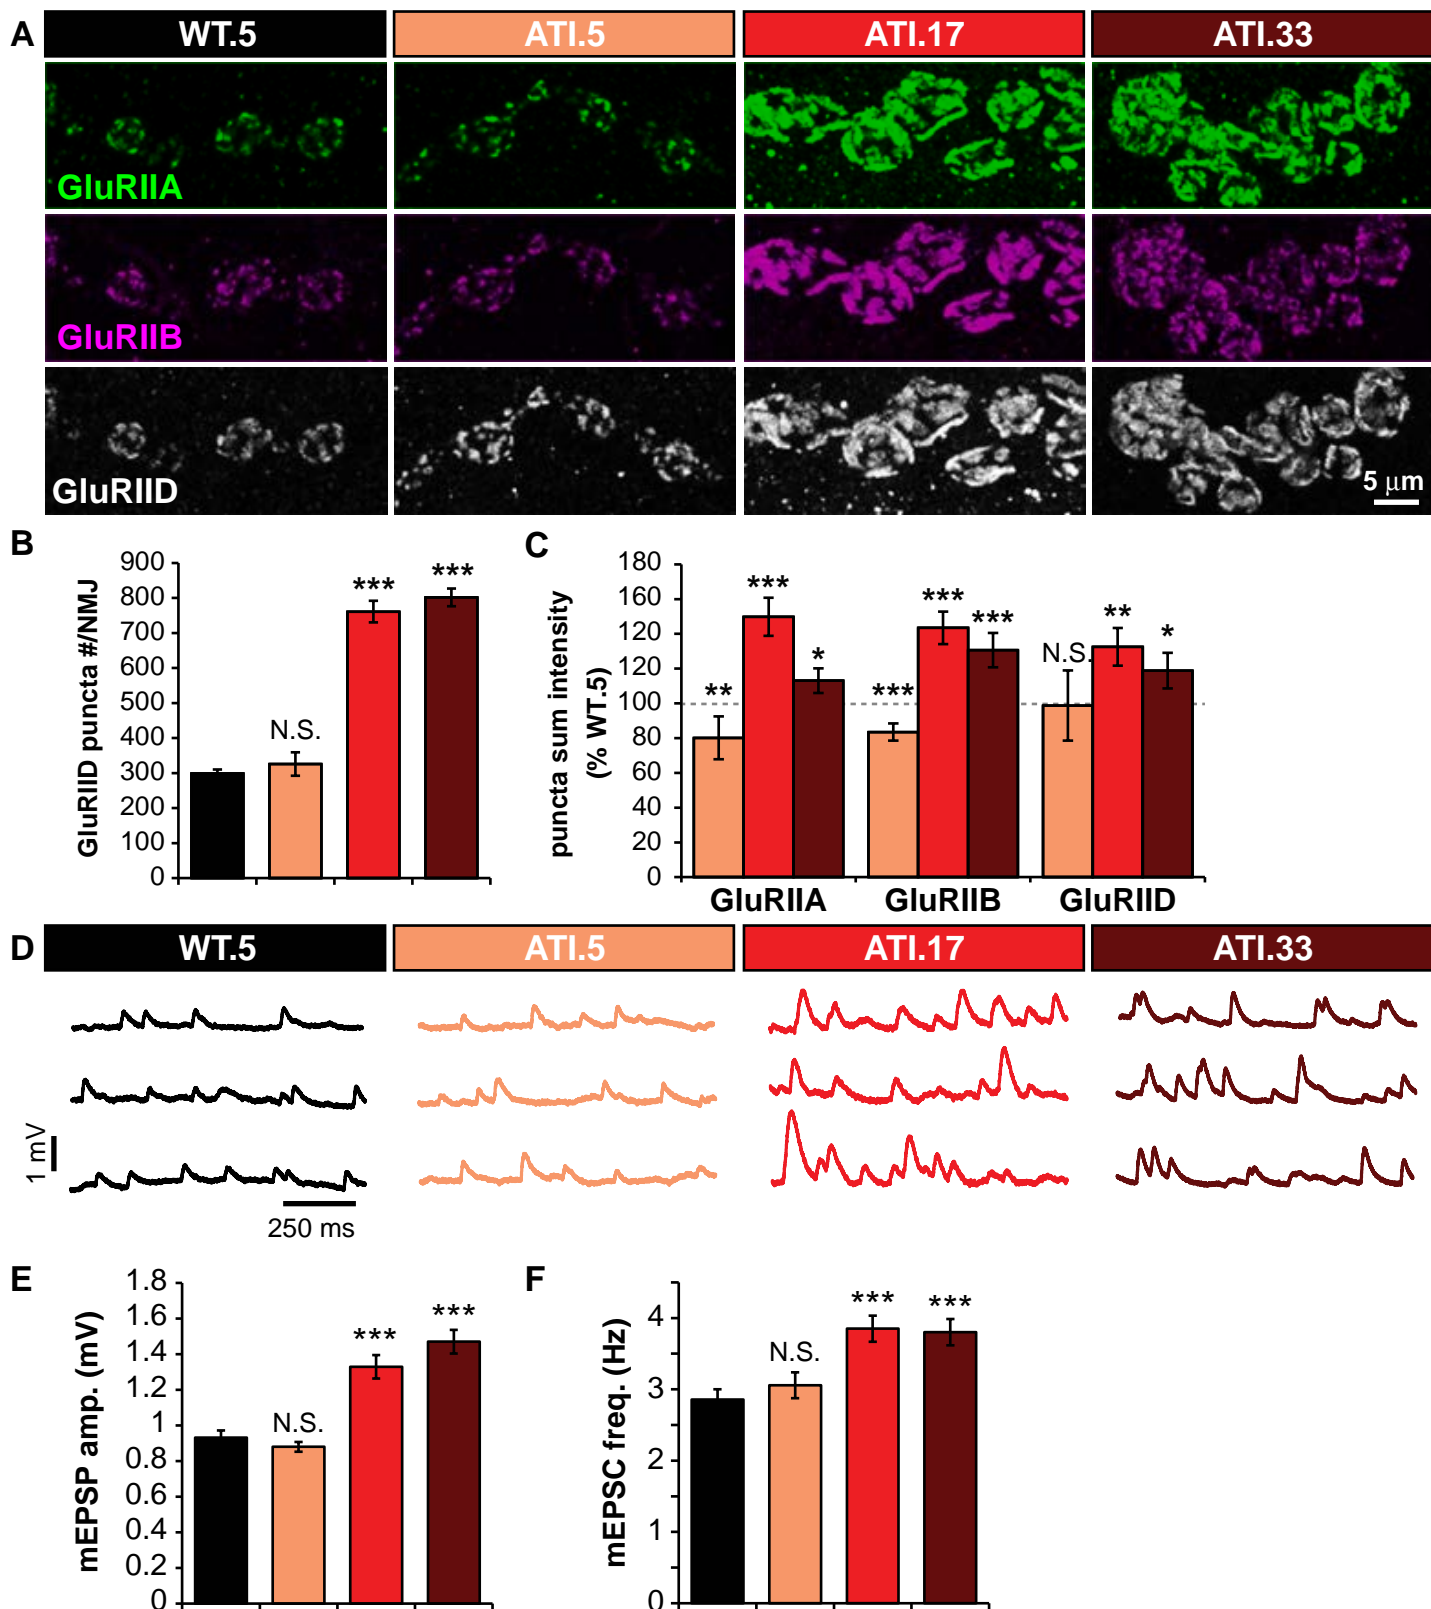

**Figure 3: Postsynaptic glutamate receptors accumulate and quantal size increases over the ATI lifespan. (A)** Representative images of the indicated GluR subunit staining at NMJ terminals of muscle 4 (1b boutons) in wild type (WT.5) and the indicated ATI time points. Quantification of GluRIID puncta number **(B)** and GluR puncta sum intensity **(C)** in the indicated genotypes. **(D)** Representative mEPSP traces of WT.5 and the indicated ATI time points. Quantification of mEPSP amplitude **(E)** and frequency **(F)** in genotypes shown in (D). Error bars indicate  $\pm$ SEM. \* $p \leq 0.05$ ; \*\* $p \leq 0.01$ ; \*\*\* $p \leq 0.001$ ; N.S = not significant,  $p > 0.05$ . Detailed statistical information (mean values, SEM, n, p) is shown in Table 1-1.

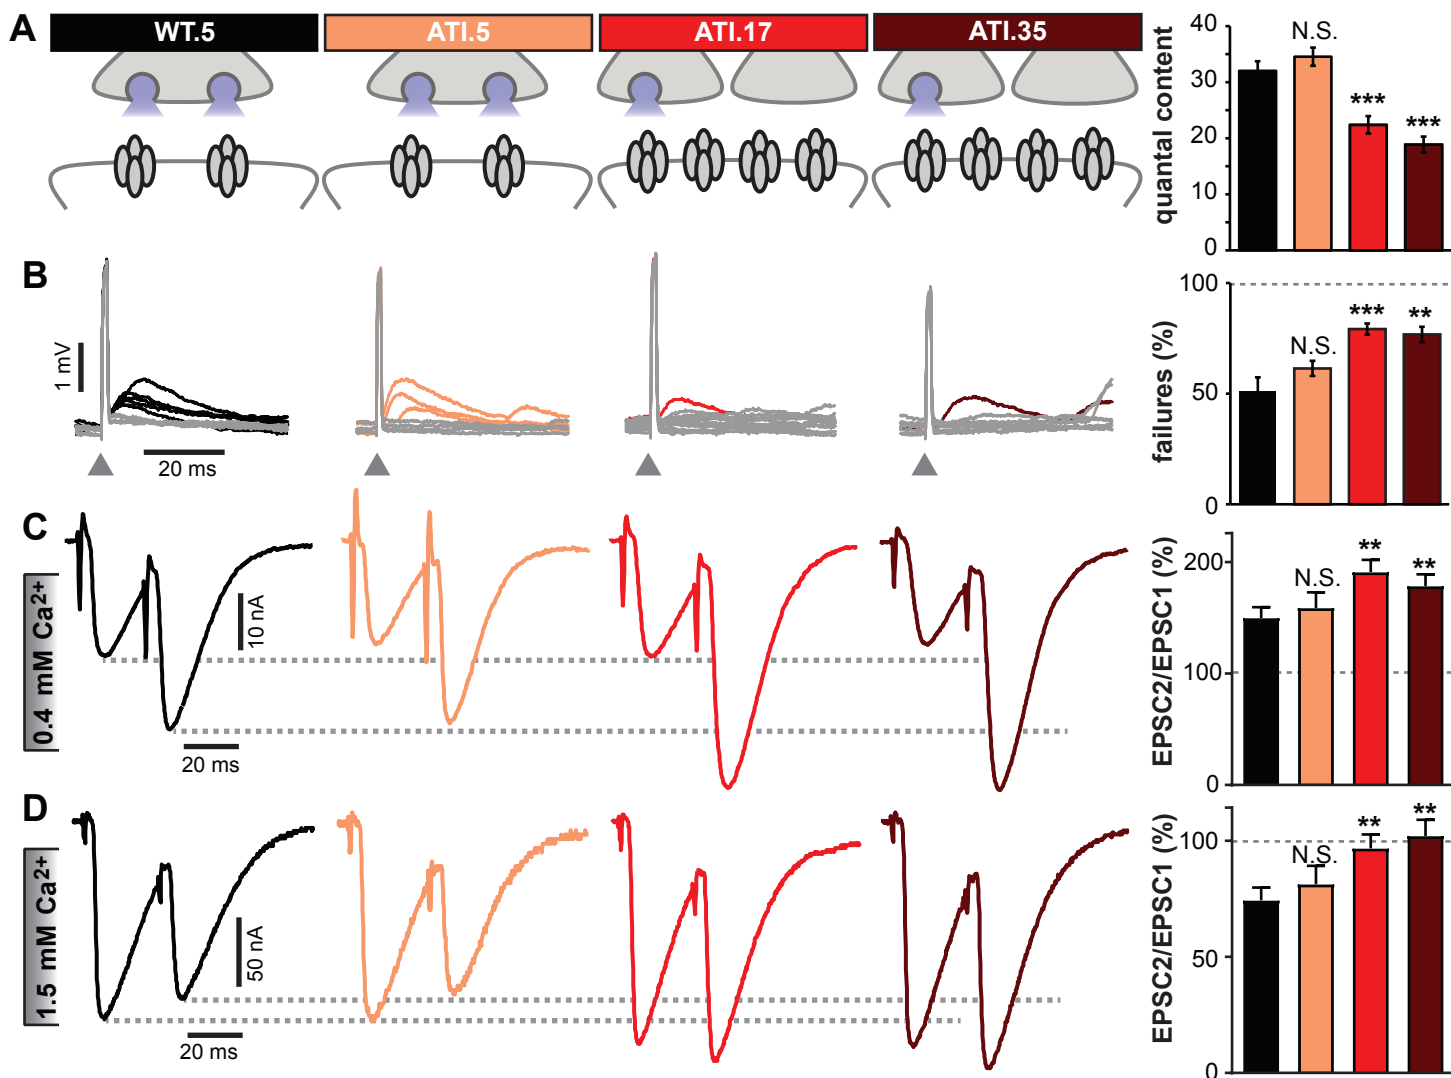



**Figure 4: A potent reduction in neurotransmitter release probability is expressed across the ATI lifespan. (A)** (Left) Schematic in the indicated genotypes illustrating reduced synaptic strength at later ATI time points. (Right) Quantal content calculated from EPSP and mEPSP data in Figs. 1 and 3. **(B)** (Left) Representative traces of attempted stimulations during failure analysis. Grey traces indicate failures and colored traces indicate successful evoked responses. Eight traces are shown for each genotype. (Right) Quantification of % failures for each genotype. **(C)** Representative two electrode voltage clamp (TEVC) traces for showing paired pulse facilitation for each genotype (left) and quantification of paired pulse ratio (right). **(D)** Representative TEVC traces for paired pulse depression for each genotype (left) and quantification of paired pulse ratio (right). Error bars indicate  $\pm$ SEM. \*\* $p \leq 0.01$ ; \*\*\* $p \leq 0.001$ ; N.S. = not significant,  $p > 0.05$ . Detailed statistical information (mean values, SEM, n, p) is shown in Table 1-1.

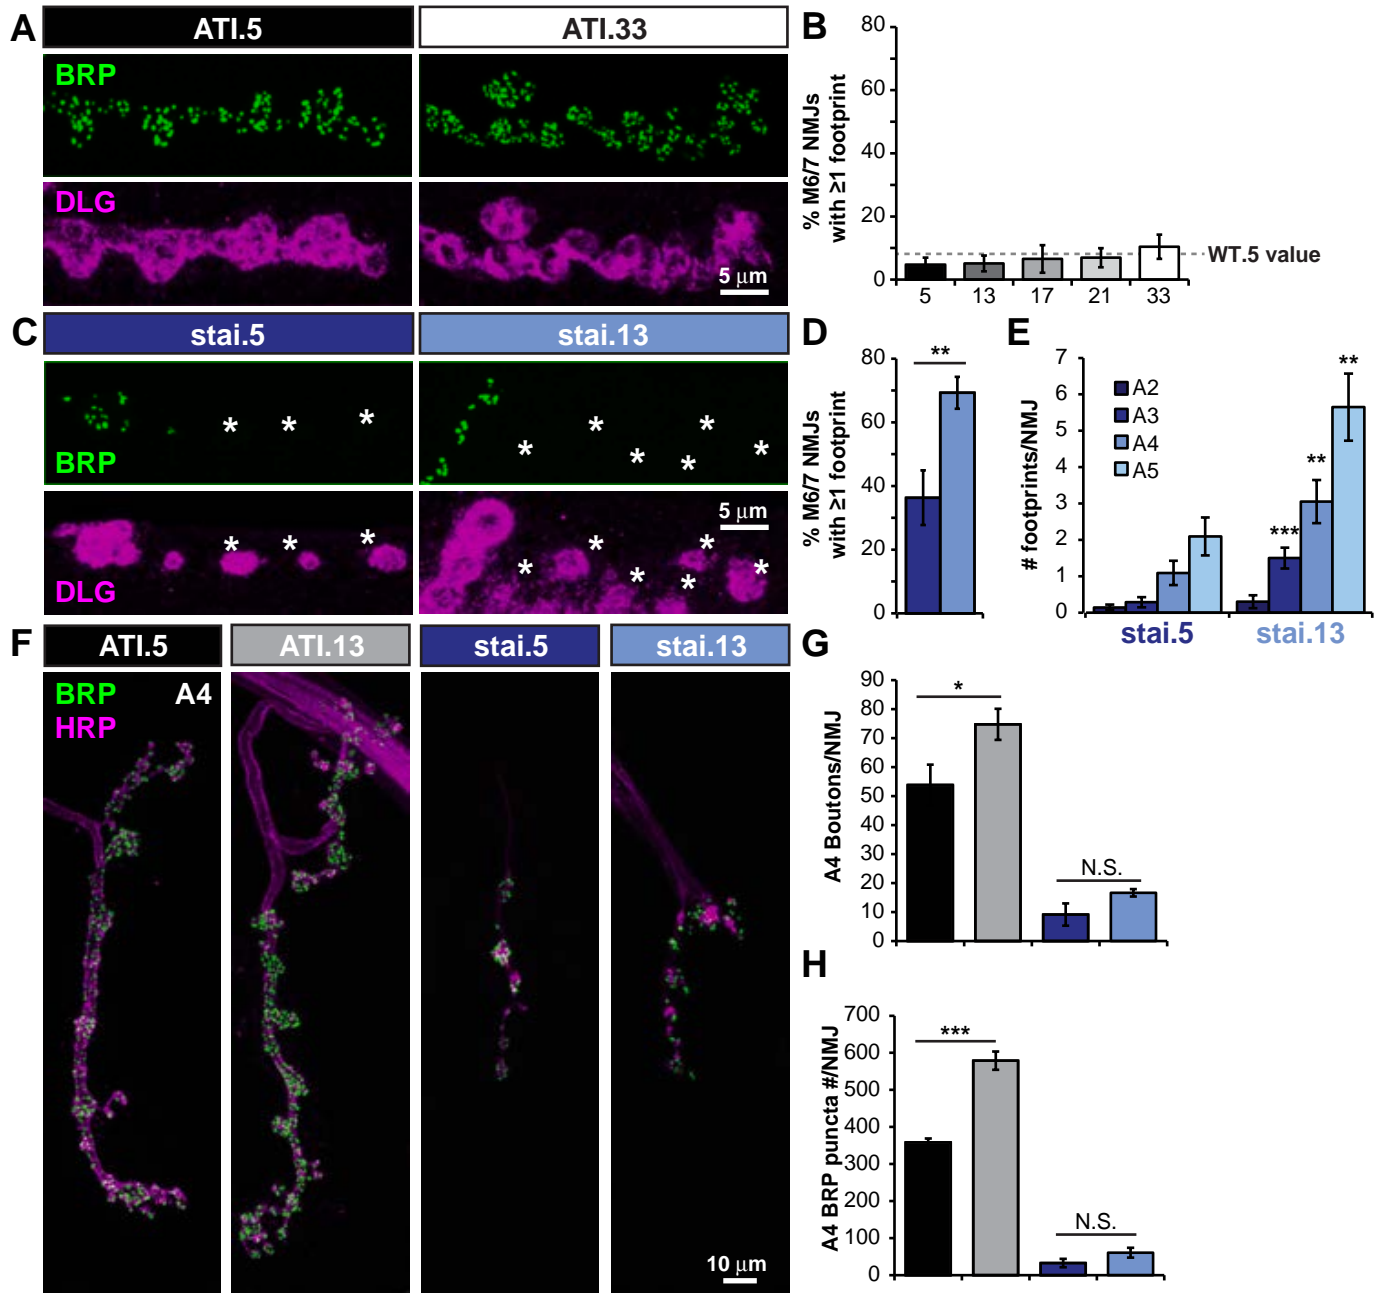

**Figure 5: Extending the larval stage reveals the progression of synaptic retractions in *stathmin* mutants.** **(A)** Representative images of ATI.5 and ATI.33 synapses stained with presynaptic (BRP) and postsynaptic (DLG) markers demonstrating a lack of presynaptic retractions at these stages. **(B)** Quantification of % NMJs at muscle 6/7 with one or more footprint observed across the ATI lifespan. The value for wild type at day 5 is shown (WT.5) by a dashed line. **(C)** Representative BRP and DLG images of *stathmin* mutant NMJs in an ATI background (*stai.5* and *stai.13*, see Table 1-1 for full genotypes) showing footprints (DLG staining without corresponding BRP marked with an asterisk). **(D)** Quantification of % NMJs with one or more footprints in *stai.5* and *stai.15* animals. **(E)** Quantification of footprints per NMJ by segment in *stathmin* mutants demonstrating more severe effects on posterior segments over time. **(F)** Representative images of wild type and *stathmin* ATI NMJs at muscle 4 (lb boutons) at day 5 and 13 stained with HRP (neuronal membrane) and BRP (active zone scaffold) showing a failure of synaptic growth in *stai* mutants. Quantification of bouton number **(G)** and BRP puncta number **(H)** per NMJ on segment A4 for the indicated genotypes. Error bars indicate  $\pm$ SEM. \* $p \leq 0.05$ ; \*\* $p \leq 0.01$ ; \*\*\* $p \leq 0.001$ ; N.S.=not significant,  $p > 0.05$ . Detailed statistical information (mean values, SEM, n, p) is shown in Table 1-1.

## Supplementary information for

### **Presynaptic depression maintains stable synaptic strength in developmentally arrested *Drosophila* larvae.**

Sarah Perry, Pragya Goel, Daniel Miller, Barry Ganetzky, and Dion Dickman

Correspondence: Dion Dickman

E-mail: [dickman@usc.edu](mailto:dickman@usc.edu)

#### **This PDF file includes**

Figure 4-1

Tables 1-1 and 2-1

Supplemental References

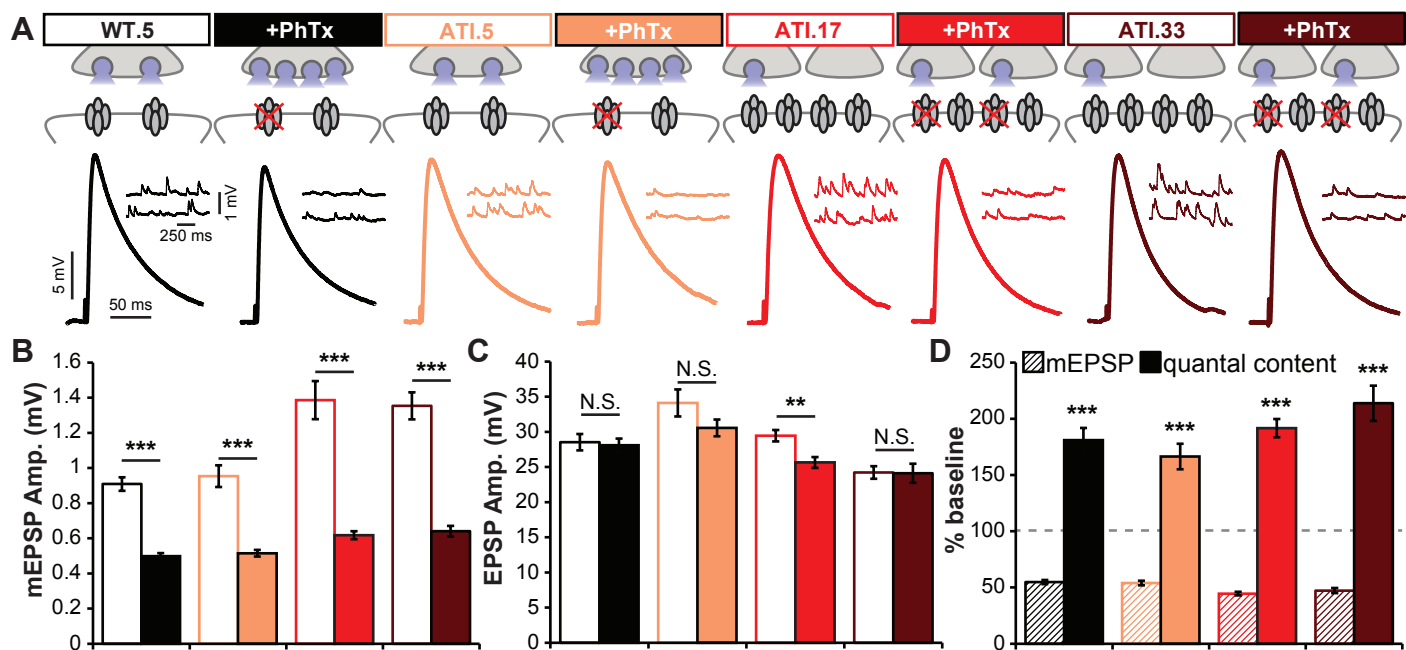

**Figure 4-1: PHP can be induced and expressed across the ATI lifespan. (A)** (Top)

Schematic illustrating baseline and +PhTx conditions at NMJs for each genotype.

(Bottom) Representative EPSP and mEPSP traces for each genotype at baseline and

+PhTx. Quantification of mEPSP amplitude **(B)**, EPSP amplitude **(C)**, and mEPSP and

quantal content values following PhTx application normalized to baseline values (-PhTx)

**(D)** in the indicated genotypes. Error bars indicate  $\pm$ SEM. \*\* $p \leq 0.01$ ; \*\*\* $p \leq 0.001$ ; N.S.=not

significant,  $p > 0.05$ . Detailed statistical information (mean values, SEM, n, p) is shown in

Table 1-1.

**Table 1-1. Data and statistical information:** All absolute values (mean, SEM, N) and statistical information (tests used and P-values) for all data points shown in Figures 1-5 and Figure 4-1 as well as supplemental data relating to these figures is shown.

**Figure 1:**

| Symbol | Genotype                           | Time Point days AEL | Muscle surface area $\mu\text{m}^2$ ( $\pm$ SEM, N) | Input resistance $\text{M}\Omega$ ( $\pm$ SEM, N) | EPSP amplitude mV ( $\pm$ SEM, N) |
|--------|------------------------------------|---------------------|-----------------------------------------------------|---------------------------------------------------|-----------------------------------|
| WT.5   | <i>W<sup>1118</sup></i>            | 5                   | 54187.28<br>(2327.86, 10)                           | 6.11 (0.31, 13)                                   | 30.25<br>(0.87, 15)               |
| ATI.5  | <i>UAS-smox-RNAi/+; phm-Gal4/+</i> | 5                   | 49086.17<br>(2581.39, 10)                           | 6 (0.32, 10)                                      | 29.71<br>(0.95, 11)               |
| ATI.9  | <i>UAS-smox-RNAi/+; phm-Gal4/+</i> | 9                   | 63157.11<br>(3264.28, 10)                           |                                                   |                                   |
| ATI.13 | <i>UAS-smox-RNAi/+; phm-Gal4/+</i> | 13                  | 64947.26<br>(1929.30, 9)                            | 4.33 (0.42, 6)                                    | 29.36<br>(1.59, 6)                |
| ATI.17 | <i>UAS-smox-RNAi/+; phm-Gal4/+</i> | 17                  | 75962.95<br>(2756.79, 10)                           | 2.41 (0.35, 19)                                   | 31.03<br>(0.99, 21)               |
| ATI.21 | <i>UAS-smox-RNAi/+; phm-Gal4/+</i> | 21                  | 73533.58<br>(5041.38, 10)                           | 2.16 (0.19, 9)                                    | 27.08<br>(1.91, 9)                |
| ATI.25 | <i>UAS-smox-RNAi/+; phm-Gal4/+</i> | 25                  | 65459.34<br>(4755.70, 10)                           |                                                   |                                   |
| ATI.29 | <i>UAS-smox-RNAi/+; phm-Gal4/+</i> | 29                  | 60284.69<br>(1918.83, 10)                           |                                                   |                                   |
| ATI.33 | <i>UAS-smox-RNAi/+; phm-Gal4/+</i> | 33                  | 62156.54<br>(3388.91, 10)                           | 3.25 (0.21, 16)                                   | 28.89<br>(0.89, 19)               |

**Statistical analysis: 1-way ANOVA**

| Arrays      | P-value  | Symbol |
|-------------|----------|--------|
| WT.5 EPSP   | 0.309981 | N.S.   |
| ATI.5 EPSP  |          |        |
| ATI.17 EPSP |          |        |
| ATI.33 EPSP |          |        |

**Figure 2:**

| Symbol | Neuronal S.A. (M4-Ib) $\mu\text{m}^2$ ( $\pm$ SEM) | Boutons M4-Ib # ( $\pm$ SEM) | BRP puncta # ( $\pm$ SEM) | BRP puncta size $\mu\text{m}^2$ ( $\pm$ SEM) | BRP puncta mean intensity % WT.5 ( $\pm$ SEM) | N  |
|--------|----------------------------------------------------|------------------------------|---------------------------|----------------------------------------------|-----------------------------------------------|----|
| WT.5   | 238.18 (10.03)                                     | 47.54 (2.44)                 | 370.11<br>(12.01)         | 0.089 (0.0037)                               | 100 (2.47)                                    | 28 |
| ATI.5  | 237.07 (10.65)                                     | 54.7 (3.9)                   | 377.8 (13.63)             | 0.084 (0.0022)                               | 105.07 (1.89)                                 | 10 |
| ATI.9  | 380.93 (24.62)                                     | 78.6 (6.97)                  | 628.8 (28.77)             | 0.085 (0.0022)                               | 93.12 (2.61)                                  | 10 |
| ATI.13 | 367.88 (25.54)                                     | 88.2 (5.89)                  | 681.71<br>(29.02)         | 0.07 (0.0031)                                | 91.85 (1.72)                                  | 10 |
| ATI.17 | 446.01 (22.63)                                     | 106.2 (10.72)                | 857.5 (37.7)              | 0.12 (0.0067)                                | 134.44 (6.19)                                 | 10 |
| ATI.21 | 545.13 (38.91)                                     | 108.4 (6.06)                 | 991.7 (65.04)             | 0.103 (0.0102)                               | 117.7 (9.98)                                  | 10 |
| ATI.25 | 566.35 (53.63)                                     | 101.2 (4.77)                 | 1042.8<br>(30.09)         | 0.108 (0.0047)                               | 115.21 (3.98)                                 | 10 |
| ATI.29 | 529.16 (35.02)                                     | 104.6 (10.61)                | 903.3 (40.15)             | 0.059 (0.006)                                | 84.37 (3.07)                                  | 10 |
| ATI.33 | 552.775 (20.11)                                    | 105.4 (7.75)                 | 843.1 (39.06)             | 0.038 (0.0074)                               | 73.69 (4.27)                                  | 10 |

**Figure 3:**

| Symbol | GluRIID puncta M4-Ib<br># ( $\pm$ SEM) | Puncta sum intensity<br>(IIA, IIB, IID)<br>% WT.5 ( $\pm$ SEM) | N  | mEPSP Amp.<br>mV ( $\pm$ SEM, N) | mEPSP freq.<br>Hz ( $\pm$ SEM, N) |
|--------|----------------------------------------|----------------------------------------------------------------|----|----------------------------------|-----------------------------------|
| WT.5   | 299.43 (11.13)                         | 100 (2.84)<br>100 (1.97)<br>100 (4.01)                         | 40 | 0.9308 (0.0411, 11)              | 2.857 (0.1437, 14)                |
| ATI.5  | 325.95 (23.8)                          | 80.13 (8.72)<br>83.49 (3.49)<br>98.75 (14.29)                  | 20 | 0.8799 (0.0276, 10)              | 3.056 (0.1818, 9)                 |
| ATI.17 | 761.05 (30.61)                         | 149.8 (10.97)<br>143.46 (9.38)<br>132.59 (10.85)               | 20 | 1.3285 (0.0657, 12)              | 3.851 (0.1824, 12)                |
| ATI.33 | 801.64 (25.18)                         | 113.09 (7.1)<br>130.63 (9.94)<br>118.81 (10.26)                | 22 | 1.47 (0.0664, 10)                | 3.803 (0.1845, 15)                |

**Statistical Analysis: 2-tailed Student's T-test**

| Array 1                | Array 2                  | P-value     | Symbol |
|------------------------|--------------------------|-------------|--------|
| WT.5 GluRIID #         | ATI.5 GluRIID #          | 0.253233954 | N.S.   |
| WT.5 GluRIID #         | ATI.17 GluRIID #         | 1.36825E-24 | ***    |
| WT.5 GluRIID #         | ATI.33 GluRIID #         | 2.3473E-29  | ***    |
| WT.5 GluRIIA intensity | ATI.5 GluRIIA intensity  | 0.008809949 | **     |
| WT.5 GluRIIA intensity | ATI.17 GluRIIA intensity | 3.71503E-07 | ***    |
| WT.5 GluRIIA intensity | ATI.33 GluRIIA intensity | 0.048327587 | *      |
| WT.5 GluRIIB intensity | ATI.5 GluRIIB intensity  | 4.08533E-05 | ***    |
| WT.5 GluRIIB intensity | ATI.17 GluRIIB intensity | 1.00443E-07 | ***    |
| WT.5 GluRIIB intensity | ATI.33 GluRIIB intensity | 0.000222584 | ***    |
| WT.5 GluRIID intensity | ATI.5 GluRIID intensity  | 0.91384072  | N.S.   |
| WT.5 GluRIID intensity | ATI.17 GluRIID intensity | 0.001117841 | **     |
| WT.5 GluRIID intensity | ATI.33 GluRIID intensity | 0.047545985 | *      |
| WT.5 mEPSP amplitude   | ATI.5 mEPSP amplitude    | 0.327204201 | N.S.   |
| WT.5 mEPSP amplitude   | ATI.17 mEPSP amplitude   | 4.01613E-05 | ***    |
| WT.5 mEPSP amplitude   | ATI.33 mEPSP amplitude   | 1.05448E-06 | ***    |
| WT.5 mEPSP frequency   | ATI.5 mEPSP frequency    | 0.397753778 | N.S.   |
| WT.5 mEPSP frequency   | ATI.17 mEPSP frequency   | 0.000225276 | ***    |
| WT.5 mEPSP frequency   | ATI.33 mEPSP frequency   | 0.000437242 | ***    |



**Figure 4:**

| <b>Symbol</b> | <b>Quantal Content<br/>(<math>\pm</math> SEM, N)</b> | <b>Failures<br/>% (<math>\pm</math> SEM, N)</b> | <b>PPF<br/>EPSC1/2 % (<math>\pm</math> SEM, N)</b> | <b>PPD<br/>EPSC1/2 % (<math>\pm</math> SEM, N)</b> |
|---------------|------------------------------------------------------|-------------------------------------------------|----------------------------------------------------|----------------------------------------------------|
| <b>WT.5</b>   | 32.02 (1.7, 11)                                      | 51.25 (6.09, 16)                                | 149.91 (9.65, 12)                                  | 74.35 (5.55, 11)                                   |
| <b>ATI.5</b>  | 34.54 (1.62, 10)                                     | 61.39 (3.41, 9)                                 | 158.91 (13.97, 9)                                  | 81.34 (7.92, 8)                                    |
| <b>ATI.17</b> | 22.38 (1.55, 12)                                     | 79.17 (2.54, 12)                                | 191.04 (11.11, 14)                                 | 96.76 (6.22, 14)                                   |
| <b>ATI.33</b> | 18.85 (1.43, 10)                                     | 76.73 (3.47, 13)                                | 178.55 (10.86, 14)                                 | 102.09 (7.01, 13)                                  |

**Statistical Analysis: 2-tailed Student's T-test**

| <b>Array 1</b>       | <b>Array 2</b>         | <b>P-value</b> | <b>Symbol</b> |
|----------------------|------------------------|----------------|---------------|
| WT.5 quantal content | ATI.5 quantal content  | 0.298373008    | N.S.          |
| WT.5 quantal content | ATI.17 quantal content | 0.00026744     | ***           |
| WT.5 quantal content | ATI.33 quantal content | 1.18278E-05    | ****          |
| WT.5 failures        | ATI.5 failures         | 0.249077828    | N.S.          |
| WT.5 failures        | ATI.17 failures        | 0.000840065    | ***           |
| WT.5 failures        | ATI.33 failures        | 0.002029811    | **            |
| WT.5 PPF             | ATI.5 PPF              | 0.213347891    | N.S.          |
| WT.5 PPF             | ATI.17 PPF             | 0.003167219    | **            |
| WT.5 PPF             | ATI.33 PPF             | 0.006518763    | **            |
| WT.5 PPD             | ATI.5 PPD              | 0.198726734    | N.S.          |
| WT.5 PPD             | ATI.17 PPD             | 0.003167234    | **            |
| WT.5 PPD             | ATI.33 PPD             | 0.002695262    | **            |

**Figure 5.**

| Symbol  | Genotype                                            | Time Point days AEL | Retractions ( $\geq 1$ footprint)<br>% NMJs ( $\pm$ SEM, N) | Boutons A4-M4-Ib<br># ( $\pm$ SEM, N) | BRP puncta<br># ( $\pm$ SEM, N) |
|---------|-----------------------------------------------------|---------------------|-------------------------------------------------------------|---------------------------------------|---------------------------------|
| WT.5    | <i>W<sup>1118</sup></i>                             | 5                   | 8.33 (2.95, 9)                                              |                                       |                                 |
| ATI.5   | <i>UAS-smox-RNAi/+; phm-Gal4/+</i>                  | 5                   | 4.69 (2.29, 8)                                              | 53.8 (7.05, 5)                        | 358.53 (10.06, 15)              |
| ATI.13  | <i>UAS-smox-RNAi/+; phm-Gal4/+</i>                  | 13                  | 5.13 (2.51, 8)                                              | 74.71 (5.37, 7)                       | 631.71 (26.27, 7)               |
| ATI.17  | <i>UAS-smox-RNAi/+; phm-Gal4/+</i>                  | 17                  | 6.55 (4.36, 6)                                              |                                       |                                 |
| ATI.21  | <i>UAS-smox-RNAi/+; phm-Gal4/+</i>                  | 21                  | 6.94 (3.03, 9)                                              |                                       |                                 |
| ATI.33  | <i>UAS-smox-RNAi/+; phm-Gal4/+</i>                  | 33                  | 10.42 (3.84, 6)                                             |                                       |                                 |
| stai.5  | <i>staiB200</i>                                     | 5                   | 36.31 (8.58, 11)                                            | 9.13 (3.85, 8)                        | 32.63 (11.3, 8)                 |
| stai.13 | <i>staiB200, UAS-smox-RNAi/staiB200; phm-Gal4/+</i> | 13                  | 69.29 (5.02, 10)                                            | 16.63 (1.25, 8)                       | 60.38 (13.26, 8)                |

| Symbol  | Genotype                                            | Time Point days AEL | Footprints/<br>NMJ (A2)<br># ( $\pm$ SEM, N) | Footprints/<br>NMJ (A3)<br># ( $\pm$ SEM, N) | Footprints/<br>NMJ (A4)<br># ( $\pm$ SEM, N) | Footprints/<br>NMJ (A5)<br># ( $\pm$ SEM, N) |
|---------|-----------------------------------------------------|---------------------|----------------------------------------------|----------------------------------------------|----------------------------------------------|----------------------------------------------|
| stai.5  | <i>staiB200</i>                                     | 5                   | 0.14 (0.078, 21)                             | 0.29 (0.14, 21)                              | 1.09 (0.33, 22)                              | 2.10 (0.52, 21)                              |
| stai.13 | <i>staiB200, UAS-smox-RNAi/staiB200; phm-Gal4/+</i> | 13                  | 0.3 (0.18, 20)                               | 1.5 (0.29, 20)                               | 3.05 (0.59, 19)                              | 5.65 (0.92, 20)                              |

**Statistical Analysis: 2-tailed Student's T-test**

| Array 1              | Array 2               | P-value     | Symbol |
|----------------------|-----------------------|-------------|--------|
| stai.5 Retractions   | stai.13 Retractions   | 0.001739115 | **     |
| ATI.5 A4 boutons     | ATI.13 A4 boutons     | 0.036948124 | *      |
| stai.5 A4 boutons    | stai.13 A4 boutons    | 0.08497713  | N.S.   |
| ATI.5 A4 BRP #       | ATI.13 A4 BRP #       | 1.55159E-10 | ***    |
| stai.5 A4 BRP #      | stai.13 A4 BRP #      | 0.133588744 | N.S.   |
| stai.5 A2 footprints | stai.13 A2 footprints | 0.418757225 | N.S.   |
| stai.5 A3 footprints | stai.13 A3 footprints | 0.000400378 | ***    |
| stai.5 A4 footprints | stai.13 A4 footprints | 0.004994405 | **     |
| stai.5 A5 footprints | stai.13 A5 footprints | 0.001560913 | **     |

**Figure 4-1.**

| Symbol        | Baseline                      |                              |                                 |   | +PhTx                         |                              |                                 |    |
|---------------|-------------------------------|------------------------------|---------------------------------|---|-------------------------------|------------------------------|---------------------------------|----|
|               | mEPSP Amp.<br>mV ( $\pm$ SEM) | EPSP Amp.<br>mV ( $\pm$ SEM) | Quantal Content<br>( $\pm$ SEM) | N | mEPSP Amp.<br>mV ( $\pm$ SEM) | EPSP Amp.<br>mV ( $\pm$ SEM) | Quantal Content<br>( $\pm$ SEM) | N  |
| <b>WT.5</b>   | 0.909<br>(0.038)              | 28.532<br>(1.166)            | 31.524 (1.275)                  | 5 | 0.498 (0.017)                 | 28.097<br>(0.93)             | 57.051 (3.442)                  | 7  |
| <b>ATI.5</b>  | 0.954<br>(0.062)              | 34.113<br>(1.928)            | 36.154 (2.263)                  | 7 | 0.515 (0.019)                 | 30.552<br>(1.184)            | 60.166 (4.105)                  | 7  |
| <b>ATI.17</b> | 1.386<br>(0.108)              | 29.437<br>(0.81)             | 22.130 (2.005)                  | 8 | 0.617 (0.022)                 | 25.643<br>(0.763)            | 42.418 (1.791)                  | 11 |
| <b>ATI.33</b> | 1.354<br>(0.077)              | 24.217<br>(0.905)            | 18.063 (0.688)                  | 7 | 0.64 (0.03)                   | 24.113<br>(1.363)            | 38.613 (2.820)                  | 10 |

**Statistical Analysis: 2-tailed Student's T-test**

| Array 1                         | Array 2                      | P-value     | Symbol |
|---------------------------------|------------------------------|-------------|--------|
| WT.5 Baseline mEPSP             | WT.5 +PhTx mEPSP             | 7.74747E-07 | ***    |
| ATI.5 Baseline mEPSP            | ATI.5 +PhTx mEPSP            | 4.8591E-06  | ***    |
| ATI.17 Baseline mEPSP           | ATI.17+PhTx mEPSP            | 4.21332E-07 | ***    |
| ATI.33 Baseline mEPSP           | ATI.33 +PhTx mEPSP           | 7.35985E-08 | ***    |
| WT.5 Baseline EPSP              | WT.5 +PhTx EPSP              | 0.774221103 | N.S.   |
| ATI.5 Baseline EPSP             | ATI.5 +PhTx EPSP             | 0.133762953 | N.S.   |
| ATI.17 Baseline EPSP            | ATI.17+PhTx EPSP             | 0.003103703 | **     |
| ATI.33 Baseline EPSP            | ATI.33 +PhTx EPSP            | 0.956749384 | N.S.   |
| WT.5 Baseline Quantal Content   | WT.5 +PhTx Quantal Content   | 0.000134197 | ***    |
| ATI.5 Baseline Quantal Content  | ATI.5 +PhTx Quantal Content  | 0.000217442 | ***    |
| ATI.17 Baseline Quantal Content | ATI.17+PhTx Quantal Content  | 6.80559E-06 | ***    |
| ATI.33 Baseline Quantal Content | ATI.33 +PhTx Quantal Content | 4.42488E-05 | ***    |

**Table 2-1: KEY RESOURCES TABLE**

| REAGENT/RESOURCE                                            | SOURCE                      | IDENTIFIER                                  |                 |
|-------------------------------------------------------------|-----------------------------|---------------------------------------------|-----------------|
| <b>Antibodies</b>                                           |                             |                                             | <b>Dilution</b> |
| Tetramethylrhodamine (TRITC)-conjugated phalloidin (R415)   | Thermo Fisher Scientific    | 41-6559-05                                  | 1:1000          |
| Mouse anti-Bruchpilot (nc82)                                | DSHB                        | AB_2314866                                  | 1:100           |
| Guinea pig anti-vGlut                                       | (Chen et al., 2017)         | N/A                                         | 1:200           |
| Mouse anti-GluRIIA (8B4D2)                                  | DSHB                        | AB_528269                                   | 1:50            |
| Affinity-Purified Rabbit anti-GluRIIB                       | (Perry et al., 2017)        | N/A                                         | 1:2000          |
| Guinea pig anti-GluRIID                                     | (Kikuma et al., 2017)       | N/A                                         | 1:1000          |
| Rabbit anti-DLG                                             | (Pielage et al., 2006)      | N/A                                         | 1:10000         |
| Alexa Dylite 405-conjugated secondary antibodies            | Jackson ImmunoResearch Labs | 706-475-148                                 | 1:400           |
| Alexa Fluor 488-conjugated secondary antibodies             | Jackson ImmunoResearch Labs | 706-545-148,<br>715-545-150,<br>711-545-152 | 1:400           |
| Alexa Fluor Cy3-conjugated secondary antibodies             | Jackson ImmunoResearch Labs | 706-165-148,<br>715-165-150,<br>711-165-152 | 1:400           |
| Alexa Fluor 647 conjugated Goat anti-Horseradish Peroxidase | Jackson ImmunoResearch Labs | 123-605-021                                 | 1:200           |
| <b>Experimental Models: Fly Lines</b>                       |                             |                                             |                 |
| <i>UAS-smox-RNAi</i>                                        | (Gibbens et al., 2011)      | BDSC #41670                                 |                 |
| <i>phm-Gal4</i>                                             | (Ono et al., 2006)          | BDSC #80577                                 |                 |
| <i>staiB200</i>                                             | (Graf et al., 2011)         | BDSC #16165                                 |                 |

### Supplemental References:

- Chen, X., Ma, W., Zhang, S., Paluch, J., Guo, W., and Dickman, D.K. (2017). The BLOC-1 Subunit Pallidin Facilitates Activity-Dependent Synaptic Vesicle Recycling. *Eneuro* 4, ENEURO.0335-16.2017.
- Gibbens, Y.Y., Warren, J.T., Gilbert, L.I., O'Connor, M.B., Cho, S.H., Smith, M.M., Padgett, R.W., and O'Connor, M.B. (2011). Neuroendocrine regulation of Drosophila metamorphosis requires TGFbeta/Activin signaling. *Development* 138, 2693–2703.
- Graf, E.R., Heerssen, H.M., Wright, C.M., Davis, G.W., and DiAntonio, A. (2011). Stathmin is Required for Stability of the Drosophila Neuromuscular Junction. *J. Neurosci.* 31, 15026–15034.
- Kikuma, K., Kim, D., Sutter, D., Li, X., and Dickman, D. (2017). Extended Synaptotagmin Is A Presynaptic ER Ca<sup>2+</sup> Sensor That Promotes Neurotransmission And Synaptic Growth In Drosophila. [Doi.org 141333](https://doi.org/10.1101/141333).
- Ono, H., Rewitz, K.F., Shinoda, T., Itoyama, K., Petryk, A., Rybczynski, R., Jarcho, M., Warren, J.T., Marqués, G., Shimell, M.J., et al. (2006). Spook and Spookier code for stage-specific components of the ecdysone biosynthetic pathway in Diptera. *Dev. Biol.* 298, 555–570.
- Perry, S., Han, Y., Das, A., and Dickman, D. (2017). Homeostatic plasticity can be induced and expressed to restore synaptic strength at neuromuscular junctions undergoing ALS-related degeneration. *Hum. Mol. Genet.*
- Pielage, J., Fetter, R.D., and Davis, G.W. (2006). A postsynaptic spectrin scaffold defines active zone size, spacing, and efficacy at the Drosophila neuromuscular junction. *J. Cell Biol.* 175, 491–503.
